# Supplementary material
Source: ML conference proceedings conference paper supplement (https://proceedings.mlr.press/v37/yange15.html)
Supplement: Supplementary file 1 [file yange15-supp.pdf]

---

# A Divide and Conquer Framework for Distributed Graph Clustering

---

**Wenzhuo Yang**

A0096049@NUS.EDU.SG

Department of Mechanical Engineering, National University of Singapore, Singapore 117576

**Huan Xu**

MPEXUH@NUS.EDU.SG

Department of Mechanical Engineering, National University of Singapore, Singapore 117576

## 1. Notations

Recall that the graph we analyzed contains  $n$  nodes and  $r$  clusters, and is generated according to the generalized stochastic blockmodel. We let  $K_i$  be the size of the  $i$ th cluster,  $K$  be the minimum cluster size, i.e.,  $K = \min_i K_i$ , and  $K^*$  be the size of the smallest cluster that contains at least one ordinary node. Therefore, edge  $(i, j)$  is present in the graph with probability  $p_{ij} \geq p$  for every pair of nodes  $i, j$  that belong to the same cluster, and edge  $(i, j)$  is present in the graph with probability  $q_{ij} \leq q$  for every pair of nodes  $i, j$  that are in different clusters. Note that the outliers in the graph do not belong to any cluster.

Let  $\mathbf{U}\Sigma\mathbf{U}^\top$  be the singular value decomposition of  $\mathbf{Y}^*$  and  $P_T(\mathbf{M}) = \mathbf{U}\mathbf{U}^\top\mathbf{M} + \mathbf{M}\mathbf{U}\mathbf{U}^\top - \mathbf{U}\mathbf{U}^\top\mathbf{M}\mathbf{U}\mathbf{U}^\top$  be the projection of  $\mathbf{M}$  onto the row and column spaces of  $\mathbf{Y}^*$ , and let  $P_{T^\perp}(\mathbf{M}) = \mathbf{M} - P_T(\mathbf{M})$ . Let  $\mathcal{R}$  be the support of  $\mathbf{Y}^*$ , i.e.,  $\mathcal{R} = \{(i, j) : Y_{ij}^* = 1\}$ ,  $\mathcal{C}$  be the set of the edges connecting to the high confidence nodes, i.e.,  $\mathcal{C} = \{(i, j) : i \text{ or } j \text{ is a high confidence node}\}$  and  $\mathcal{A}$  be the support of  $\mathbf{A}$ , i.e.,  $\mathcal{A} = \{(i, j) : A_{ij} = 1\}$ . For a set of matrix indices  $\Omega$ , we let  $P_\Omega(\mathbf{M})$  be the matrix whose  $(i, j)$ th entry equals  $M_{ij}$  if  $(i, j) \in \Omega$  or 0 otherwise. We let  $\mathbf{E}$  be the matrix whose entries are all ones.

## 2. Proof of Theorem 1

For clarity, we let

$$\lambda = \frac{c_0}{\sqrt{\max\{n - s, K^*\} \log n}}, \quad c_{\mathcal{A}} = \sqrt{\frac{1-t}{t}}, \quad c_{\mathcal{A}^c} = \sqrt{\frac{t}{1-t}}, \quad \tau = \min\{\tau_1, \tau_2\}.$$

In other words, “ $c_{\mathcal{A}}$ ” and “ $c_{\mathcal{A}^c}$ ” in Equation (1) are replaced by  $\lambda c_{\mathcal{A}}$  and  $\lambda c_{\mathcal{A}^c}$ , respectively. Recall that  $K = \min_i K_i$  and  $K^* = \min\{K_i : \text{cluster } i \text{ contains at least one ordinary node}\}$ . If all the nodes are high confident, we let  $K^* = K$  without loss of generality. Clearly,  $K^* > K$  means that there exist some clusters whose nodes are all high confident. We denote the set of the nodes in these clusters by  $\mathcal{N}$ . Let  $\mathcal{H} = \{(i, j) : i \text{ or } j \in \mathcal{N}\}$ . Obviously,  $\mathcal{H} \subseteq \mathcal{C}$ . Let  $\mathcal{E} = \{(i, i) : i = 1, \dots, n\}$  be the set of the diagonal entries. We first explore the sufficient conditions such that the true adjacent matrix  $\mathbf{Y}^*$  is the unique optimal solution of (1). In the proofs, the constants may vary from line to line.

**Lemma A-1.** *For any matrix  $\mathbf{X} \in \mathbb{R}^{n \times n}$ ,  $P_{\mathcal{H}^c} P_T P_{\mathcal{H}} \mathbf{X} = 0$  and  $P_{\mathcal{H}} P_T P_{\mathcal{H}^c} \mathbf{X} = 0$ .*

*Proof.* We need to show that  $\text{support}(P_T P_{\mathcal{H}} \mathbf{X}) \subseteq \mathcal{H}$  and  $\text{support}(P_T P_{\mathcal{H}^c} \mathbf{X}) \subseteq \mathcal{H}^c$ . Recall that  $P_T(\mathbf{M}) = \mathbf{U}\mathbf{U}^\top\mathbf{M} + \mathbf{M}\mathbf{U}\mathbf{U}^\top - \mathbf{U}\mathbf{U}^\top\mathbf{M}\mathbf{U}\mathbf{U}^\top$ , since  $\mathcal{H}$  is “symmetric”, namely,  $(i, j) \in \mathcal{H}$  implies  $(j, i) \in \mathcal{H}$ , we only need to show that

$\text{support}(\mathbf{U}\mathbf{U}^\top P_{\mathcal{H}}\mathbf{X}) \subseteq \mathcal{H}$  and  $\text{support}(\mathbf{U}\mathbf{U}^\top P_{\mathcal{H}^c}\mathbf{X}) \subseteq \mathcal{H}^c$ . For any  $(i, j) \notin \mathcal{H}$ , suppose that  $i, j$  belong to clusters  $R(i)$  and  $R(j)$ , respectively. From the definition of  $\mathcal{H}$ , we know that  $R(i), R(j) \not\subseteq \mathcal{H}$ , which implies that  $(k, j) \notin \mathcal{H}$  for all  $k$  such that  $(i, k) \in R(i)$ . Thus, we have

$$(\mathbf{U}\mathbf{U}^\top P_{\mathcal{H}}\mathbf{X})_{ij} = \sum_{k:(i,k) \in R(i)} (\mathbf{U}\mathbf{U}^\top)_{ik} (P_{\mathcal{H}}\mathbf{X})_{kj} = 0, \text{ for } (i, j) \notin \mathcal{H}.$$

Similarly, we can prove that  $(\mathbf{U}\mathbf{U}^\top P_{\mathcal{H}^c}\mathbf{X})_{ij} = 0$  for all  $(i, j) \in \mathcal{H}$ .  $\square$

**Lemma A-2.**  $(\mathbf{Y}^*, \mathbf{A} - \mathbf{Y}^*)$  is the unique optimal solution of (1), if there exist matrices  $\mathbf{W}_1, \mathbf{W}_2$  and a positive number  $\epsilon < 0.5$  such that (a)  $P_{\mathcal{H}}\mathbf{W}_1 = 0, P_{\mathcal{H}^c}\mathbf{W}_2 = 0$ , (b)  $\|\mathbf{W}_1\| \leq \frac{1}{2}, \|\mathbf{W}_2\| \leq \frac{1}{2}$ , (c)  $\|P_T\mathbf{W}_1\|_\infty \leq \frac{1}{2}\epsilon \min\{\lambda_{c_A}, \lambda_{c_{A^c}}, c_C\}$ ,  $\|P_T\mathbf{W}_2\|_\infty \leq \frac{1}{4}c_C$  and (d)

- I.  $(1 - \epsilon)\lambda_{c_A} - P_{\mathcal{R} \cap \mathcal{A} \cap \mathcal{C}^c \cap \mathcal{H}^c}(\mathbf{U}\mathbf{U}^\top + \mathbf{W}_1) \geq 0$ ,
- II.  $-(1 + \epsilon)\lambda_{c_{A^c}} - P_{\mathcal{R} \cap \mathcal{A}^c \cap \mathcal{C}^c \cap \mathcal{H}^c}(\mathbf{U}\mathbf{U}^\top + \mathbf{W}_1) \geq 0$ ,
- III.  $-(1 + \epsilon)\lambda_{c_A} + P_{\mathcal{R}^c \cap \mathcal{A} \cap \mathcal{C}^c \cap \mathcal{H}^c}(\mathbf{W}_1) \geq 0$ ,
- IV.  $(1 - \epsilon)\lambda_{c_{A^c}} + P_{\mathcal{R}^c \cap \mathcal{A}^c \cap \mathcal{C}^c \cap \mathcal{H}^c}(\mathbf{W}_1) \geq 0$ ,
- V.  $(1 - \epsilon)c_C - P_{\mathcal{R} \cap \mathcal{A} \cap \mathcal{C} \cap \mathcal{H}^c}(\mathbf{U}\mathbf{U}^\top + \mathbf{W}_1) \geq 0$ ,
- VI.  $-(1 + \epsilon)c_C - P_{\mathcal{R} \cap \mathcal{A}^c \cap \mathcal{C} \cap \mathcal{H}^c}(\mathbf{U}\mathbf{U}^\top + \mathbf{W}_1) \geq 0$ ,
- VII.  $-(1 + \epsilon)c_C + P_{\mathcal{R}^c \cap \mathcal{A} \cap \mathcal{C} \cap \mathcal{H}^c}(\mathbf{W}_1) \geq 0$ ,
- VIII.  $(1 - \epsilon)c_C + P_{\mathcal{R}^c \cap \mathcal{A}^c \cap \mathcal{C} \cap \mathcal{H}^c}(\mathbf{W}_1) \geq 0$ ,
- IX.  $\frac{1}{2}c_C - P_{\mathcal{R} \cap \mathcal{A} \cap \mathcal{H}}(\mathbf{U}\mathbf{U}^\top + \mathbf{W}_2) \geq 0$ ,
- X.  $-\frac{3}{2}c_C - P_{\mathcal{R} \cap \mathcal{A}^c \cap \mathcal{H}}(\mathbf{U}\mathbf{U}^\top + \mathbf{W}_2) \geq 0$ ,
- XI.  $-\frac{3}{2}c_C + P_{\mathcal{R}^c \cap \mathcal{A} \cap \mathcal{H}}(\mathbf{W}_2) \geq 0$ ,
- XII.  $\frac{1}{2}c_C + P_{\mathcal{R}^c \cap \mathcal{A}^c \cap \mathcal{H}}(\mathbf{W}_2) \geq 0$ ,

*Proof.* When the conditions above are satisfied, we need to show that the following inequality holds for any  $\mathbf{Y}$  and  $\mathbf{S}$  such that  $\mathbf{Y} \neq \mathbf{Y}^*, 0 \leq \mathbf{Y} \leq 1$  and  $\mathbf{Y} + \mathbf{S} = \mathbf{A}$ :

$$\begin{aligned} \text{Opt} &\triangleq \|\mathbf{Y}^*\|_* + \lambda_{c_A} \|P_{\mathcal{A} \cap \mathcal{C}^c} \mathbf{S}^*\|_1 + \lambda_{c_{A^c}} \|P_{\mathcal{A}^c \cap \mathcal{C}^c} \mathbf{S}^*\|_1 + c_C \|P_{\mathcal{C}} \mathbf{S}^*\|_1 \\ &< \|\mathbf{Y}\|_* + \lambda_{c_A} \|P_{\mathcal{A} \cap \mathcal{C}^c} \mathbf{S}\|_1 + \lambda_{c_{A^c}} \|P_{\mathcal{A}^c \cap \mathcal{C}^c} \mathbf{S}\|_1 + c_C \|P_{\mathcal{C}} \mathbf{S}\|_1. \end{aligned}$$

So we need to prove that

$$\begin{aligned} \Delta &\triangleq [\|\mathbf{Y}\|_* + \lambda_{c_A} \|P_{\mathcal{A} \cap \mathcal{C}^c} \mathbf{S}\|_1 + \lambda_{c_{A^c}} \|P_{\mathcal{A}^c \cap \mathcal{C}^c} \mathbf{S}\|_1 + c_C \|P_{\mathcal{C}} \mathbf{S}\|_1] - \\ &[\|\mathbf{Y}^*\|_* + \lambda_{c_A} \|P_{\mathcal{A} \cap \mathcal{C}^c} \mathbf{S}^*\|_1 + \lambda_{c_{A^c}} \|P_{\mathcal{A}^c \cap \mathcal{C}^c} \mathbf{S}^*\|_1 + c_C \|P_{\mathcal{C}} \mathbf{S}^*\|_1] \\ &= \|\mathbf{Y}\|_* - \|\mathbf{Y}^*\|_* + \lambda_{c_A} (\|P_{\mathcal{A} \cap \mathcal{C}^c} \mathbf{S}\|_1 - \|P_{\mathcal{A} \cap \mathcal{C}^c} \mathbf{S}^*\|_1) + \\ &\quad \lambda_{c_{A^c}} (\|P_{\mathcal{A}^c \cap \mathcal{C}^c} \mathbf{S}\|_1 - \|P_{\mathcal{A}^c \cap \mathcal{C}^c} \mathbf{S}^*\|_1) + c_C (\|P_{\mathcal{C}} \mathbf{S}\|_1 - \|P_{\mathcal{C}} \mathbf{S}^*\|_1) \\ &= \lambda_{c_A} \sum_{(i,j) \in \mathcal{A} \cap \mathcal{C}^c} (Y_{ij}^* - Y_{ij}) + \lambda_{c_{A^c}} \sum_{(i,j) \in \mathcal{A}^c \cap \mathcal{C}^c} (Y_{ij} - Y_{ij}^*) + \\ &\quad c_C \sum_{(i,j) \in \mathcal{A} \cap \mathcal{C}} (Y_{ij}^* - Y_{ij}) + c_C \sum_{(i,j) \in \mathcal{A}^c \cap \mathcal{C}} (Y_{ij} - Y_{ij}^*) + \|\mathbf{Y}\|_* - \|\mathbf{Y}^*\|_* > 0 \end{aligned}$$

Let  $\mathbf{W} = \mathbf{W}_1 + \mathbf{W}_2$ , then  $\mathbf{U}\mathbf{U}^\top + \mathbf{W} - P_T(\mathbf{W})$  is a subgradient of  $f(\mathbf{X}) = \|\mathbf{X}\|_*$  at  $\mathbf{X} = \mathbf{Y}^*$ , which implies that

$\|\mathbf{Y}\|_* - \|\mathbf{Y}^*\|_* \geq \langle \mathbf{U}\mathbf{U}^\top + \mathbf{W} - P_T(\mathbf{W}), \mathbf{Y} - \mathbf{Y}^* \rangle$ . Hence we have

$$\begin{aligned} \Delta &\geq \lambda c_{\mathcal{A}} \sum_{(i,j) \in \mathcal{A} \cap \mathcal{C}^c} (Y_{ij}^* - Y_{ij}) + \lambda c_{\mathcal{A}^c} \sum_{(i,j) \in \mathcal{A}^c \cap \mathcal{C}^c} (Y_{ij} - Y_{ij}^*) + \\ &\quad c_{\mathcal{C}} \sum_{(i,j) \in \mathcal{A} \cap \mathcal{C}} (Y_{ij}^* - Y_{ij}) + c_{\mathcal{C}} \sum_{(i,j) \in \mathcal{A}^c \cap \mathcal{C}} (Y_{ij} - Y_{ij}^*) + \\ &\quad \langle \mathbf{U}\mathbf{U}^\top + \mathbf{W}, \mathbf{Y} - \mathbf{Y}^* \rangle + \langle -P_T(\mathbf{W}), \mathbf{Y} - \mathbf{Y}^* \rangle \end{aligned}$$

By Lemma A-1 and Condition (d), we have

$$\begin{aligned} \Delta &\geq \langle \lambda c_{\mathcal{A}} \mathbf{E} - (\mathbf{U}\mathbf{U}^\top + \mathbf{W}), P_{\mathcal{A} \cap \mathcal{C}^c}(\mathbf{Y}^* - \mathbf{Y}) \rangle + \langle -\lambda c_{\mathcal{A}^c} \mathbf{E} - (\mathbf{U}\mathbf{U}^\top + \mathbf{W}), P_{\mathcal{A}^c \cap \mathcal{C}^c}(\mathbf{Y}^* - \mathbf{Y}) \rangle + \\ &\quad \langle c_{\mathcal{C}} \mathbf{E} - (\mathbf{U}\mathbf{U}^\top + \mathbf{W}), P_{\mathcal{A} \cap \mathcal{C}}(\mathbf{Y}^* - \mathbf{Y}) \rangle + \langle -c_{\mathcal{C}} \mathbf{E} - (\mathbf{U}\mathbf{U}^\top + \mathbf{W}), P_{\mathcal{A}^c \cap \mathcal{C}}(\mathbf{Y}^* - \mathbf{Y}) \rangle + \\ &\quad \langle -P_T(\mathbf{W}_1) - P_T(\mathbf{W}_2), \mathbf{Y} - \mathbf{Y}^* \rangle \\ &\geq \langle \epsilon \lambda c_{\mathcal{A}} \mathbf{E}, P_{\mathcal{R} \cap \mathcal{A} \cap \mathcal{C}^c}(\mathbf{Y}^* - \mathbf{Y}) \rangle + \langle \epsilon \lambda c_{\mathcal{A}^c} \mathbf{E}, P_{\mathcal{R}^c \cap \mathcal{A} \cap \mathcal{C}^c}(\mathbf{Y} - \mathbf{Y}^*) \rangle + \langle \epsilon \lambda c_{\mathcal{A}^c} \mathbf{E}, P_{\mathcal{R} \cap \mathcal{A}^c \cap \mathcal{C}^c}(\mathbf{Y}^* - \mathbf{Y}) \rangle + \\ &\quad \langle \epsilon \lambda c_{\mathcal{A}^c} \mathbf{E}, P_{\mathcal{R}^c \cap \mathcal{A}^c \cap \mathcal{C}^c}(\mathbf{Y} - \mathbf{Y}^*) \rangle + \langle \epsilon c_{\mathcal{C}} \mathbf{E}, P_{\mathcal{R} \cap \mathcal{C} \cap \mathcal{H}^c}(\mathbf{Y}^* - \mathbf{Y}) \rangle + \langle \epsilon c_{\mathcal{C}} \mathbf{E}, P_{\mathcal{R}^c \cap \mathcal{C} \cap \mathcal{H}^c}(\mathbf{Y} - \mathbf{Y}^*) \rangle + \\ &\quad \langle \frac{1}{2} c_{\mathcal{C}} \mathbf{E}, P_{\mathcal{R} \cap \mathcal{H}}(\mathbf{Y}^* - \mathbf{Y}) \rangle + \langle \frac{1}{2} c_{\mathcal{C}} \mathbf{E}, P_{\mathcal{R}^c \cap \mathcal{H}}(\mathbf{Y} - \mathbf{Y}^*) \rangle + \langle -P_T(\mathbf{W}_1) - P_T(\mathbf{W}_2), \mathbf{Y} - \mathbf{Y}^* \rangle \\ &= \epsilon \lambda c_{\mathcal{A}} \|P_{\mathcal{A} \cap \mathcal{C}^c}(\mathbf{Y} - \mathbf{Y}^*)\|_1 + \epsilon \lambda c_{\mathcal{A}^c} \|P_{\mathcal{A}^c \cap \mathcal{C}^c}(\mathbf{Y} - \mathbf{Y}^*)\|_1 + \epsilon c_{\mathcal{C}} \|P_{\mathcal{C} \cap \mathcal{H}^c}(\mathbf{Y} - \mathbf{Y}^*)\|_1 + \\ &\quad \frac{1}{2} c_{\mathcal{C}} \|P_{\mathcal{H}}(\mathbf{Y} - \mathbf{Y}^*)\|_1 + \langle -P_T(\mathbf{W}_1) - P_T(\mathbf{W}_2), \mathbf{Y} - \mathbf{Y}^* \rangle \\ &\geq \lambda \epsilon \min\{c_{\mathcal{A}}, c_{\mathcal{A}^c}, c_{\mathcal{C}}\} \|P_{\mathcal{H}^c}(\mathbf{Y} - \mathbf{Y}^*)\|_1 + \frac{1}{2} c_{\mathcal{C}} \|P_{\mathcal{H}}(\mathbf{Y} - \mathbf{Y}^*)\|_1 - \langle P_T(\mathbf{W}_1), \mathbf{Y} - \mathbf{Y}^* \rangle - \langle P_T(\mathbf{W}_2), \mathbf{Y} - \mathbf{Y}^* \rangle \\ &= \lambda \epsilon \min\{c_{\mathcal{A}}, c_{\mathcal{A}^c}, c_{\mathcal{C}}\} \|P_{\mathcal{H}^c}(\mathbf{Y} - \mathbf{Y}^*)\|_1 + \frac{1}{2} c_{\mathcal{C}} \|P_{\mathcal{H}}(\mathbf{Y} - \mathbf{Y}^*)\|_1 - \langle P_T(\mathbf{W}_1), P_{\mathcal{H}^c}(\mathbf{Y} - \mathbf{Y}^*) \rangle - \langle P_T(\mathbf{W}_2), P_{\mathcal{H}}(\mathbf{Y} - \mathbf{Y}^*) \rangle \\ &\geq (\lambda \epsilon \min\{c_{\mathcal{A}}, c_{\mathcal{A}^c}, c_{\mathcal{C}}\} - \|P_T(\mathbf{W}_1)\|_\infty) \|P_{\mathcal{H}^c}(\mathbf{Y} - \mathbf{Y}^*)\|_1 + (\frac{1}{2} c_{\mathcal{C}} - \|P_T(\mathbf{W}_2)\|_\infty) \|P_{\mathcal{H}}(\mathbf{Y} - \mathbf{Y}^*)\|_1 \\ &\geq \frac{1}{2} \lambda \epsilon \min\{c_{\mathcal{A}}, c_{\mathcal{A}^c}, c_{\mathcal{C}}\} \|P_{\mathcal{H}^c}(\mathbf{Y} - \mathbf{Y}^*)\|_1 + \frac{1}{4} c_{\mathcal{C}} \|P_{\mathcal{H}}(\mathbf{Y} - \mathbf{Y}^*)\|_1 > 0. \end{aligned}$$

Hence we obtain this lemma.  $\square$

From the conditions in Theorem 1, we know that

$$\lambda = \frac{c_0}{\sqrt{\max\{n-s, K^*\} \log n}}, c_{\mathcal{C}} = \frac{c_0}{\sqrt{K \log n}} \geq \frac{c_0}{\sqrt{K^* \log n}} \text{ and } \frac{p-q}{\sqrt{p(1-q)}} \geq \frac{c_1}{\lambda K^*}.$$

Let  $\epsilon = \frac{c_2}{\sqrt{t(1-t)}} \cdot \frac{1}{\lambda K^*}$ , we have the following two lemmas. For simplicity, we do not provide the explicit values for the constants  $c, c_0, c_1, c_2, c_3, c_\tau, c_K$  used in the following proofs. One can easily verify that such constants exist, e.g.,  $c_1 = 200c, c_2 = 1, c_0 = \frac{1}{2048c^2}, c_3 \geq 512c^2, c_\tau \leq \frac{1}{4096c^2}, c_K \geq \frac{1}{8}$  for  $c \geq 1$ .

**Lemma A-3.** (a)  $t(1-t) \geq \frac{c_3}{\lambda^2 K^{*2}}$ ; (b)  $0 < \epsilon < 0.5$ ; (c)  $(1+\epsilon)^{\frac{1-p}{p}} \leq (1-2\epsilon)^{\frac{1-t}{t}}$ ; (d)  $(1+\epsilon)^{\frac{q}{1-q}} \leq (1-\epsilon)^{\frac{t}{1-t}}$ .

*Proof.* Since  $\frac{1}{4}p + \frac{3}{4}q \leq t \leq \frac{3}{4}p + \frac{1}{4}q$ ,  $t(1-t) \geq \frac{1}{2} \min\{t, 1-t\} \geq \frac{1}{8}(p-q) \geq \frac{1}{8} \sqrt{p(1-q)} \frac{c_1}{\lambda K^*} \geq \frac{1}{8} \sqrt{t(1-t)} \frac{c_1}{\lambda K^*}$ , (a) holds when  $\frac{c_1^2}{64} \geq c_3$ . By choosing proper constants, e.g.,  $\frac{c_2^2}{c_3} \leq \frac{1}{4}$ , (b) follows from (a) directly. For (c), note that  $p-t \geq \frac{p-q}{4} \geq \sqrt{p(1-q)} \frac{c_1}{4\lambda K^*} \geq \frac{c_1}{4c_2} p(1-t)\epsilon$ . It can be easily verified that this implies (c) when  $\frac{c_1}{c_2} \geq 32$ . Similarly,  $t-q \geq \frac{p-q}{4} \geq \frac{c_1}{4c_2} p(1-t)\epsilon \geq \frac{c_1}{16c_2} t(1-q)\epsilon$  since  $1-t \geq \frac{1}{4}(1-q)$ , which implies (d) when  $\frac{c_1}{c_2} \geq 32$ .  $\square$

**Lemma A-4.**  $p \geq \frac{c_3}{\lambda^2 K^{*2}} \geq c_3 \max\{\frac{\log n}{K^*}, \frac{(n-s) \log n}{K^{*2}}\}$ .

*Proof.* By Lemma A-3,  $p \geq t(1-t) \geq \frac{c_3}{\lambda^2 K^{*2}} \geq c_3 \max\{\frac{\log n}{K^*}, \frac{(n-s) \log n}{K^{*2}}\}$ .  $\square$

In the following parts, we will construct  $\mathbf{W}_1$  and  $\mathbf{W}_2$  to meet the conditions in Lemma A-2.

### 2.1. Construct $\mathbf{W}_1$

We now construct  $\mathbf{W}_1$  such that the conditions in Lemma A-2 are satisfied.

**Step 1. Construct the dual certificate  $\mathbf{W}_1$ :** We let  $\mathbf{W}_1 = \mathbf{Q}_1 + \mathbf{Q}_2 + \mathbf{Q}_3 + \mathbf{Q}_4$ , where  $\mathbf{Q}_1, \mathbf{Q}_2, \mathbf{Q}_3, \mathbf{Q}_4$  are defined as follows:

$$\mathbf{Q}_1(i, j) = \begin{cases} -(\mathbf{U}\mathbf{U}^\top)_{ij}, & (i, j) \in \mathcal{R} \cap \mathcal{A}^c \cap \mathcal{H}^c \\ \frac{1-p_{ij}}{p_{ij}}(\mathbf{U}\mathbf{U}^\top)_{ij}, & (i, j) \in \mathcal{R} \cap \mathcal{C}^c \cap \mathcal{A} \cap \mathcal{H}^c \\ \frac{1-\tau_1}{\tau_1}(\mathbf{U}\mathbf{U}^\top)_{ij}, & (i, j) \in \mathcal{R} \cap \mathcal{C} \cap \mathcal{A} \cap \mathcal{H}^c \\ 0, & \text{otherwise} \end{cases}$$

$$\mathbf{Q}_2(i, j) = \begin{cases} -(1+\epsilon)\lambda c_{\mathcal{A}^c}, & (i, j) \in \mathcal{R} \cap \mathcal{C}^c \cap \mathcal{A}^c \cap \mathcal{H}^c \\ \frac{1-p_{ij}}{p_{ij}}(1+\epsilon)\lambda c_{\mathcal{A}^c}, & (i, j) \in \mathcal{R} \cap \mathcal{C}^c \cap \mathcal{A} \cap \mathcal{H}^c \\ -(1+\epsilon)c_{\mathcal{C}}, & (i, j) \in \mathcal{R} \cap \mathcal{C} \cap \mathcal{A}^c \cap \mathcal{H}^c \\ \frac{1-\tau_1}{\tau_1}(1+\epsilon)c_{\mathcal{C}}, & (i, j) \in \mathcal{R} \cap \mathcal{C} \cap \mathcal{A} \cap \mathcal{H}^c \\ 0, & \text{otherwise} \end{cases}$$

$$\mathbf{Q}_3(i, j) = \begin{cases} (1+\epsilon)\lambda c_{\mathcal{A}}, & (i, j) \in \mathcal{R}^c \cap \mathcal{C}^c \cap \mathcal{A} \cap \mathcal{H}^c \cap \mathcal{E}^c \\ -\frac{q_{ij}}{1-q_{ij}}(1+\epsilon)\lambda c_{\mathcal{A}}, & (i, j) \in \mathcal{R}^c \cap \mathcal{C}^c \cap \mathcal{A}^c \cap \mathcal{H}^c \cap \mathcal{E}^c \\ (1+\epsilon)c_{\mathcal{C}}, & (i, j) \in \mathcal{R}^c \cap \mathcal{C} \cap \mathcal{A} \cap \mathcal{H}^c \\ -\frac{1-\tau_2}{\tau_2}(1+\epsilon)c_{\mathcal{C}}, & (i, j) \in \mathcal{R}^c \cap \mathcal{C} \cap \mathcal{A}^c \cap \mathcal{H}^c \\ 0, & \text{otherwise} \end{cases}$$

$$\mathbf{Q}_4(i, j) = \begin{cases} (1+\epsilon)\lambda c_{\mathcal{A}}, & (i, j) \in \mathcal{R}^c \cap \mathcal{E} \\ 0, & \text{otherwise} \end{cases}$$

It can be easily verified that  $\mathbb{E}[\mathbf{Q}_1] = \mathbb{E}[\mathbf{Q}_2] = \mathbb{E}[\mathbf{Q}_3] = 0$ , and

$$|\mathbf{Q}_1(i, j)| \leq \frac{1}{pK^*}, \quad |\mathbf{Q}_2(i, j)| \leq \max\left\{\frac{2\lambda c_{\mathcal{A}^c}}{p}, 2c_{\mathcal{C}}\right\}, \quad |\mathbf{Q}_3(i, j)| \leq \max\left\{\frac{2\lambda c_{\mathcal{A}}}{1-q}, 2c_{\mathcal{C}}\right\}.$$

Note that  $\tau = \min\{\tau_1, \tau_2\} \geq \frac{4}{5}$  and  $q \leq t \leq p$ , by simple calculation, we have

$$\begin{aligned} \text{Var}[\mathbf{Q}_1(i, j)] &\leq \frac{1-p}{pK^{*2}} \leq \frac{1}{pK^{*2}}, & (i, j) \in \mathcal{C}^c \\ \text{Var}[\mathbf{Q}_1(i, j)] &\leq \frac{2(1-\tau)}{K^{*2}}, & (i, j) \in \mathcal{C} \\ \text{Var}[\mathbf{Q}_2(i, j)] &\leq \frac{4\lambda^2 c_{\mathcal{A}^c}^2 (1-p)}{p} \leq \frac{4\lambda^2 c_{\mathcal{A}^c}^2 (1-t)}{p}, & (i, j) \in \mathcal{C}^c \\ \text{Var}[\mathbf{Q}_2(i, j)] &\leq 8c_{\mathcal{C}}^2 (1-\tau), & (i, j) \in \mathcal{C} \\ \text{Var}[\mathbf{Q}_3(i, j)] &\leq \frac{4\lambda^2 c_{\mathcal{A}}^2 q}{1-q} \leq \frac{4\lambda^2 c_{\mathcal{A}}^2 t}{1-q}, & (i, j) \in \mathcal{C}^c \\ \text{Var}[\mathbf{Q}_3(i, j)] &\leq 8c_{\mathcal{C}}^2 (1-\tau), & (i, j) \in \mathcal{C} \end{aligned}$$

**Step 2. Bound  $\|\mathbf{W}_1\|$ :** From Lemma A-5, the following inequalities hold with high probability:

$$\begin{aligned}\|\mathbf{Q}_1\| &\leq c \left[ \frac{\log n}{pK^*} + \sqrt{\frac{2n(1-\tau)}{K^{*2}} + \frac{n-s}{pK^{*2}}} \cdot \sqrt{\log n} \right] \\ \|\mathbf{Q}_2\| &\leq c \left[ \max\left\{\frac{2\lambda c_{A^c}}{p}, 2c_C\right\} \log n + \sqrt{8nc_C^2(1-\tau) + (n-s)\frac{4\lambda^2 c_{A^c}^2(1-t)}{p}} \cdot \sqrt{\log n} \right] \\ \|\mathbf{Q}_3\| &\leq c \left[ \max\left\{\frac{2\lambda c_A}{1-q}, 2c_C\right\} \log n + \sqrt{8nc_C^2(1-\tau) + (n-s)\frac{4\lambda^2 c_A^2 t}{1-q}} \cdot \sqrt{\log n} \right]\end{aligned}$$

Recall that  $K^* \geq K \geq c_K \log n$ ,  $\lambda = \frac{c_0}{\sqrt{\max\{n-s, K^*\} \log n}}$ ,  $1-\tau \leq c_\tau \frac{K}{n}$  and  $c_C = \frac{c_0}{\sqrt{K \log n}}$ . From Lemma A-4,  $p \geq c_3 \frac{\log n}{K^*}$ , which implies that  $c \max\left\{\frac{\log n}{pK^*}, \frac{\log n}{K}\right\} \leq \frac{1}{16}$ . On the other hand,  $p \geq c_3 \frac{(n-s) \log n}{K^{*2}}$ , so  $c \sqrt{\frac{2n(1-\tau)}{K^{*2}} + \frac{n-s}{pK^{*2}}} \cdot \sqrt{\log n} \leq c \sqrt{\frac{c_\tau}{c_K \log n} + \frac{1}{c_3 \log n}} \cdot \sqrt{\log n} \leq \frac{1}{16}$ . Hence  $\|\mathbf{Q}_1\| \leq \frac{1}{8}$ .

To bound  $\|\mathbf{Q}_2\|$ , note that  $\frac{\lambda c_{A^c}}{p} = \lambda \frac{1}{p} \sqrt{\frac{t}{1-t}} \leq \lambda \frac{1}{\sqrt{t(1-t)}} \leq \frac{\lambda^2 K^*}{c_3} \leq \frac{1}{c_3 \log n}$  and  $c_C \log n = \sqrt{\frac{c_0 \log n}{K}}$ , so  $c \max\left\{\frac{2\lambda c_{A^c}}{p}, 2c_C\right\} \log n \leq \frac{1}{16}$ . We also have  $(n-s) \frac{\lambda^2 c_{A^c}^2 (1-t)}{p} = (n-s) \frac{\lambda^2}{p} \cdot \frac{t}{1-t} \cdot (1-t) \leq (n-s) \lambda^2 \leq \frac{c_0}{\log n}$  and  $nc_C^2(1-\tau) \leq \frac{c_0^2 c_\tau}{\log n}$  which implies  $c \sqrt{8nc_C^2(1-\tau) + (n-s)\frac{4\lambda^2 c_{A^c}^2 (1-t)}{p}} \cdot \sqrt{\log n} \leq \frac{1}{16}$ , so that  $\|\mathbf{Q}_2\| \leq \frac{1}{8}$ . Similarly, we can prove that  $\|\mathbf{Q}_3\| \leq \frac{1}{8}$ . For  $\|\mathbf{Q}_4\|$ , note that  $(1+\epsilon)\lambda c_A \leq 2\lambda c_A = 2\lambda \sqrt{\frac{1-t}{t}} \leq 2\lambda \frac{1}{\sqrt{t(1-t)}} \leq \frac{2}{c_3 \log n} \leq \frac{1}{8}$ . Hence  $\|\mathbf{W}\| \leq \|\mathbf{Q}_1\| + \|\mathbf{Q}_2\| + \|\mathbf{Q}_3\| + \|\mathbf{Q}_4\| \leq \frac{1}{2}$ .

**Step 3. Bound  $\|P_T \mathbf{W}_1\|_\infty$ :** Since  $\|P_T \mathbf{W}_1\|_\infty = \|\mathbf{U}\mathbf{U}^\top \mathbf{W}_1 + \mathbf{W}_1 \mathbf{U}\mathbf{U}^\top - \mathbf{U}\mathbf{U}^\top \mathbf{W}_1 \mathbf{U}\mathbf{U}^\top\|_\infty \leq 3\|\mathbf{U}\mathbf{U}^\top \mathbf{W}_1\|_\infty$ , we only need to bound  $\|\mathbf{U}\mathbf{U}^\top \mathbf{W}_1\|_\infty$ . By Lemma A-6, the following inequalities hold with high probability

$$\begin{aligned}|(\mathbf{U}\mathbf{U}^\top \mathbf{Q}_1)_{ij}| &\leq c \left( \frac{\sqrt{(2s(1-\tau)/K^{*2} + (n-s)/(pK^{*2})) \log n}}{K^*} + \frac{\log n}{pK^{*2}} \right) \\ |(\mathbf{U}\mathbf{U}^\top \mathbf{Q}_2)_{ij}| &\leq c \left( \frac{\sqrt{(8sc_C^2(1-\tau) + 4(n-s)\lambda^2 c_{A^c}^2 (1-t)/p) \log n}}{K^*} + \max\left\{\frac{2\lambda c_{A^c}}{p}, 2c_C\right\} \cdot \frac{\log n}{K^*} \right) \\ |(\mathbf{U}\mathbf{U}^\top \mathbf{Q}_3)_{ij}| &\leq c \left( \frac{\sqrt{(8sc_C^2(1-\tau) + 4(n-s)\lambda^2 c_A^2 t/(1-q)) \log n}}{K^*} + \max\left\{\frac{2\lambda c_A}{1-q}, 2c_C\right\} \cdot \frac{\log n}{K^*} \right)\end{aligned}$$

We now show that these upper bounds are less than  $\frac{1}{6}\epsilon \min\{\lambda c_A, \lambda c_{A^c}, c_C\}$ . Since  $c_C \geq \lambda$  and  $\min\{c_A, c_{A^c}\} \leq 1$ ,  $\frac{1}{6}\epsilon \min\{\lambda c_A, \lambda c_{A^c}, c_C\} = \frac{1}{6}\epsilon \min\{\lambda c_A, \lambda c_{A^c}\}$ . Note that

$$\begin{aligned}\epsilon \lambda c_A &= \lambda \cdot \frac{c_2}{\sqrt{t(1-t)}} \cdot \frac{1}{\lambda K^*} \cdot \sqrt{\frac{1-t}{t}} = \frac{c_2}{tK^*} \geq \frac{c_2}{K^*}, \\ \epsilon \lambda c_{A^c} &= \lambda \cdot \frac{c_2}{\sqrt{t(1-t)}} \cdot \frac{1}{\lambda K^*} \cdot \sqrt{\frac{t}{1-t}} = \frac{c_2}{(1-t)K^*} \geq \frac{c_2}{K^*}.\end{aligned}$$

We now verify that all the terms in  $|(\mathbf{U}\mathbf{U}^\top \mathbf{Q}_1)_{ij}|$ ,  $|(\mathbf{U}\mathbf{U}^\top \mathbf{Q}_2)_{ij}|$  and  $|(\mathbf{U}\mathbf{U}^\top \mathbf{Q}_3)_{ij}|$  are less than  $\frac{c_2}{6K^*}$ . Since  $1-\tau \leq c_\tau \frac{K}{n}$  and  $K^* \geq K \geq c_K \log n$ , we have  $\frac{2c_C \log n}{K^*} = \sqrt{\frac{\log n}{K}} \cdot \frac{2c_0}{K^*} \leq \frac{c_2}{K^*}$ ,  $\frac{s(1-\tau)}{K^{*2}} \leq \frac{c_\tau}{K^*}$  and  $sc_C^2(1-\tau) \leq \frac{c_0^2 c_\tau}{\log n}$ , which implies that  $\frac{\sqrt{2s(1-\tau) \log n / K^{*2}}}{K^*} \leq \sqrt{\frac{2c_\tau}{K^{*3}}} \leq \frac{c_2}{18K^*}$  and  $\frac{\sqrt{8sc_C^2(1-\tau) \log n}}{K^*} \leq \frac{\sqrt{8c_0^2 c_\tau}}{K^*} \leq \frac{c_2}{18K^*}$ .

For  $|(\mathbf{U}\mathbf{U}^\top \mathbf{Q}_1)_{ij}|$ ,

$$\frac{\log n}{pK^{*2}} \leq \frac{\log n}{c_3 \frac{\log n}{K^*} \cdot K^{*2}} = \frac{1}{c_3 K^*} \leq \frac{c_2}{18K^*},$$

$$\frac{\sqrt{(n-s) \log n / (pK^{*2})}}{K^*} \leq \frac{\sqrt{(n-s) \log n / (c_3(n-s) \log n)}}{K^*} = \frac{1}{\sqrt{c_3} K^*} \leq \frac{c_2}{18K^*}.$$

For  $|(\mathbf{U}\mathbf{U}^\top \mathbf{Q}_2)_{ij}|$ ,

$$\frac{\lambda c_{\mathcal{A}^c} \log n}{pK^*} = \lambda \log n \cdot \sqrt{\frac{t}{1-t}} \cdot \frac{1}{pK^*} \leq \frac{\lambda \log n}{K^*} \sqrt{\frac{1}{t(1-t)}} \leq \frac{\lambda \log n}{K^*} \sqrt{\frac{\lambda^2 K^{*2}}{c_3}} = \frac{\lambda^2 \log n}{\sqrt{c_3}} \leq \frac{c_0^2}{\sqrt{c_3} K^*} \leq \frac{c_2}{18K^*},$$

$$\frac{\sqrt{(n-s) \lambda^2 c_{\mathcal{A}^c}^2 (1-t) \log n / p}}{K^*} \leq \frac{\sqrt{\lambda^2 (n-s) \log n \cdot \frac{t}{1-t} \cdot \frac{1-t}{p}}}{K^*} \leq \frac{\sqrt{\lambda^2 (n-s) \log n}}{K^*} \leq \frac{c_0}{K^*} \leq \frac{c_2}{18K^*}.$$

For  $|(\mathbf{U}\mathbf{U}^\top \mathbf{Q}_3)_{ij}|$ ,

$$\frac{\lambda c_{\mathcal{A}} \log n}{(1-q)K^*} = \lambda \log n \cdot \sqrt{\frac{1-t}{t}} \cdot \frac{1}{(1-q)K^*} \leq \frac{\lambda \log n}{K^*} \sqrt{\frac{1}{t(1-t)}} \leq \frac{\lambda \log n}{K^*} \sqrt{\frac{\lambda^2 K^{*2}}{c_3}} = \frac{\lambda^2 \log n}{\sqrt{c_3}} \leq \frac{c_0^2}{\sqrt{c_3} K^*} \leq \frac{c_2}{18K^*},$$

$$\frac{\sqrt{(n-s) \lambda^2 c_{\mathcal{A}}^2 t \log n / (1-q)}}{K^*} \leq \frac{\sqrt{\lambda^2 (n-s) \log n \cdot \frac{1-t}{t} \cdot \frac{t}{1-q}}}{K^*} \leq \frac{\sqrt{\lambda^2 (n-s) \log n}}{K^*} \leq \frac{c_0}{K^*} \leq \frac{c_2}{18K^*}.$$

For  $|(\mathbf{U}\mathbf{U}^\top \mathbf{Q}_4)_{ij}|$ , we know that  $|(\mathbf{U}\mathbf{U}^\top \mathbf{Q}_4)_{ij}| = 0$ . Hence we conclude that  $\|P_T \mathbf{W}_1\|_\infty \leq \frac{1}{2} \epsilon \min\{\lambda c_{\mathcal{A}}, \lambda c_{\mathcal{A}^c}, c_c\}$ .

**Step 4. Verify Condition (c):** From the construction of  $\mathbf{W}_1$ , we know that the inequalities (II)(III)(VI)(VII) hold. We now show that the other inequalities also hold. From Lemma A-3(c),

$$(1+\epsilon) \frac{1-p}{p} \leq (1-2\epsilon) \frac{1-t}{t} \iff (1+\epsilon) \lambda \frac{c_{\mathcal{A}^c}(1-p)}{p} \leq (1-2\epsilon) \lambda c_{\mathcal{A}}.$$

Thus, for  $(i, j) \in \mathcal{R} \cap \mathcal{A} \cap \mathcal{C}^c \cap \mathcal{H}^c$ ,

$$(\mathbf{U}\mathbf{U}^\top + \mathbf{W}_1)_{ij} = \frac{1}{p} (\mathbf{U}\mathbf{U}^\top)_{ij} + (1+\epsilon) \lambda \frac{c_{\mathcal{A}^c}(1-p)}{p} \leq \frac{1}{pK^*} + (1-2\epsilon) \lambda c_{\mathcal{A}}$$

Recall that  $\epsilon \lambda c_{\mathcal{A}} \geq \frac{c_2}{tK^*} \geq \frac{1}{pK^*}$ , hence (I) holds. From Lemma A-3(d),

$$(1+\epsilon) \frac{q}{1-q} \leq (1-\epsilon) \frac{t}{1-t} \iff -(1+\epsilon) \lambda \frac{c_{\mathcal{A}} q}{1-q} \geq -(1-\epsilon) \lambda c_{\mathcal{A}^c},$$

which implies (IV). Since  $\epsilon < 0.5$ ,

$$(1-\epsilon) c_c \geq \frac{1}{2} c_c = \frac{c_0}{2\sqrt{K \log n}} \geq \frac{5}{K^*}.$$

On the other hand, since  $\tau \geq \frac{4}{5}$ , for  $(i, j) \in \mathcal{R} \cap \mathcal{A} \cap \mathcal{C} \cap \mathcal{H}^c$ ,

$$(\mathbf{U}\mathbf{U}^\top + \mathbf{W})_{ij} \leq \frac{1}{\tau K^*} + (1+\epsilon) c_c \frac{1-\tau}{\tau} \leq \frac{5}{4K^*} + \frac{3}{8} c_c \leq \frac{5}{4K^*} + \frac{15}{4K^*} = \frac{5}{K^*},$$

and for  $(i, j) \in \mathcal{R}^c \cap \mathcal{A}^c \cap \mathcal{C} \cap \mathcal{H}^c$ ,

$$\mathbf{W}_1(i, j) + (1 - \epsilon)c_{\mathcal{C}} \geq (1 - \epsilon)c_{\mathcal{C}} - (1 + \epsilon)c_{\mathcal{C}} \frac{1 - \tau}{\tau} \geq \frac{1}{2}c_{\mathcal{C}} - \frac{3}{2}c_{\mathcal{C}} \frac{1 - \tau}{\tau} \geq \frac{1}{8}c_{\mathcal{C}} \geq 0,$$

so (V) and (VIII) hold.

## 2.2. Construct $\mathbf{W}_2$

**Step 1. Construct the dual certificate  $\mathbf{W}_2$ :** We let  $\mathbf{W}_2 = \mathbf{Q}_1 + \mathbf{Q}_2 + \mathbf{Q}_3$ , where  $\mathbf{Q}_1, \mathbf{Q}_2, \mathbf{Q}_3$  are defined as follows:

$$\mathbf{Q}_1(i, j) = \begin{cases} -(\mathbf{U}\mathbf{U}^\top)_{ij}, & (i, j) \in \mathcal{R} \cap \mathcal{A}^c \cap \mathcal{H} \\ \frac{1-\tau_1}{\tau_1}(\mathbf{U}\mathbf{U}^\top)_{ij}, & (i, j) \in \mathcal{R} \cap \mathcal{A} \cap \mathcal{H} \\ 0, & (i, j) \in \mathcal{H}^c \end{cases}$$

$$\mathbf{Q}_2(i, j) = \begin{cases} -\frac{3}{2}c_{\mathcal{C}}, & (i, j) \in \mathcal{R} \cap \mathcal{A}^c \cap \mathcal{H} \\ \frac{3(1-\tau_1)}{2\tau_1}c_{\mathcal{C}}, & (i, j) \in \mathcal{R} \cap \mathcal{A} \cap \mathcal{H} \\ 0, & (i, j) \in \mathcal{H}^c \end{cases}$$

$$\mathbf{Q}_3(i, j) = \begin{cases} \frac{3}{2}c_{\mathcal{C}}, & (i, j) \in \mathcal{R}^c \cap \mathcal{A} \cap \mathcal{H} \\ -\frac{3(1-\tau_2)}{2\tau_2}c_{\mathcal{C}}, & (i, j) \in \mathcal{R}^c \cap \mathcal{A}^c \cap \mathcal{H} \\ 0, & (i, j) \in \mathcal{H}^c \end{cases}$$

It can be easily verified that  $\mathbb{E}[\mathbf{Q}_1] = \mathbb{E}[\mathbf{Q}_2] = \mathbb{E}[\mathbf{Q}_3] = 0$ , and

$$|\mathbf{Q}_1(i, j)| \leq \frac{1}{K}, \quad |\mathbf{Q}_2(i, j)| \leq 2c_{\mathcal{C}}, \quad |\mathbf{Q}_3(i, j)| \leq 2c_{\mathcal{C}},$$

$$\text{Var}[\mathbf{Q}_1(ij)] \leq \frac{2(1-\tau)}{K^2}, \quad \text{Var}[\mathbf{Q}_2(ij)] \leq 5c_{\mathcal{C}}^2(1-\tau), \quad \text{Var}[\mathbf{Q}_3(ij)] \leq 5c_{\mathcal{C}}^2(1-\tau).$$

**Step 2. Bound  $\|\mathbf{W}_2\|$  and  $\|P_T \mathbf{W}_2\|_\infty$ :** From Lemma A-5, the following inequalities hold with high probability:

$$\|\mathbf{Q}_1\| \leq c \left[ \frac{\log n}{K} + \sqrt{\frac{2n(1-\tau) \log n}{K^2}} \right]$$

$$\|\mathbf{Q}_2\| \leq c \left[ 2c_{\mathcal{C}} \log n + \sqrt{5nc_{\mathcal{C}}^2(1-\tau) \log n} \right]$$

$$\|\mathbf{Q}_3\| \leq c \left[ 2c_{\mathcal{C}} \log n + \sqrt{5nc_{\mathcal{C}}^2(1-\tau) \log n} \right]$$

Recall that  $1 - \tau \leq c_\tau \frac{K}{n}$ ,  $K \geq c_K \log n$  and  $c_{\mathcal{C}} = \frac{c_0}{\sqrt{K \log n}}$ . Thus,  $\|\mathbf{W}\| \leq \|\mathbf{Q}_1\| + \|\mathbf{Q}_2\| + \|\mathbf{Q}_3\| \leq \frac{1}{2}$ . Since  $\|P_T \mathbf{W}_2\|_\infty = \|\mathbf{U}\mathbf{U}^\top \mathbf{W}_2 + \mathbf{W}_2 \mathbf{U}\mathbf{U}^\top - \mathbf{U}\mathbf{U}^\top \mathbf{W}_2 \mathbf{U}\mathbf{U}^\top\|_\infty \leq 3\|\mathbf{U}\mathbf{U}^\top \mathbf{W}_2\|_\infty$ , we only need to bound  $\|\mathbf{U}\mathbf{U}^\top \mathbf{W}_2\|_\infty$ .

By Lemma A-6, the following inequalities hold with high probability

$$\begin{aligned} |(\mathbf{U}\mathbf{U}^\top \mathbf{Q}_1)_{ij}| &\leq c \left( \frac{\sqrt{2n(1-\tau)\log n}}{K^2} + \frac{\log n}{K^2} \right) \\ |(\mathbf{U}\mathbf{U}^\top \mathbf{Q}_2)_{ij}| &\leq c \left( \frac{\sqrt{5nc_c^2(1-\tau)\log n}}{K} + \frac{2c_c \log n}{K} \right) \\ |(\mathbf{U}\mathbf{U}^\top \mathbf{Q}_3)_{ij}| &\leq c \left( \frac{\sqrt{5nc_c^2(1-\tau)\log n}}{K} + \frac{2c_c \log n}{K} \right) \end{aligned}$$

Since  $K \geq c_K \log n$ ,  $|(\mathbf{U}\mathbf{U}^\top \mathbf{Q}_1)_{ij}|$ ,  $|(\mathbf{U}\mathbf{U}^\top \mathbf{Q}_2)_{ij}|$  and  $|(\mathbf{U}\mathbf{U}^\top \mathbf{Q}_3)_{ij}|$  are all less than  $\frac{1}{4}c_c$  when  $c_K$  is large enough.

**Step 3. Verify Condition (d):** From the construction of  $\mathbf{W}_2$ , we know that the inequalities (X)(XI) hold. We now show that the other inequalities also hold. Observe that

$$\frac{1}{2}c_c = \frac{c_0}{2\sqrt{K\log n}} \geq \frac{5}{K}.$$

On the other hand, since  $\tau \geq \frac{4}{5}$ , for  $(i, j) \in \mathcal{R} \cap \mathcal{A} \cap \mathcal{H}$ ,

$$(\mathbf{U}\mathbf{U}^\top + \mathbf{W})_{ij} \leq \frac{1}{\tau K} + \frac{3}{2}c_c \frac{1-\tau}{\tau} \leq \frac{5}{4K^*} + \frac{3}{8}c_c \leq \frac{5}{4K^*} + \frac{15}{4K^*} = \frac{5}{K^*},$$

and for  $(i, j) \in \mathcal{R}^c \cap \mathcal{A}^c \cap \mathcal{H}$ ,

$$\mathbf{W}_{ij} + \frac{1}{2}c_c = \frac{1}{2}c_c - \frac{3}{2}c_c \frac{1-\tau}{\tau} \geq \frac{1}{2}c_c - \frac{3}{8}c_c = \frac{1}{8}c_c \geq 0,$$

so (IX) and (XII) hold.

### 2.3. The ‘‘Outlier-free’’ Case

The proofs in this setup are almost the same as above. Recall that  $K_i$  is the size of the  $i$ th cluster and  $s_i$  is the number of high confidence nodes in the  $i$ th cluster. In this case, we just need to let

$$\lambda = \frac{c_0}{\sqrt{\max\{K^*, \max_i \{\sum_{j \neq i} (K_i - s_i)\}\} \log n}}.$$

For the dual certificate  $\mathbf{W}_1$ , we let  $\mathbf{W}_1 = \mathbf{Q}_1 + \mathbf{Q}_2 + \mathbf{Q}_3$ , where  $\mathbf{Q}_1, \mathbf{Q}_2, \mathbf{Q}_3$  are defined as follows:

$$\mathbf{Q}_1(i, j) = \begin{cases} -(\mathbf{U}\mathbf{U}^\top)_{ij}, & (i, j) \in \mathcal{R} \cap \mathcal{A}^c \cap \mathcal{H}^c \\ \frac{1-p_{ij}}{p_{ij}}(\mathbf{U}\mathbf{U}^\top)_{ij}, & (i, j) \in \mathcal{R} \cap \mathcal{C}^c \cap \mathcal{A} \cap \mathcal{H}^c \\ \frac{1-\tau_1}{\tau_1}(\mathbf{U}\mathbf{U}^\top)_{ij}, & (i, j) \in \mathcal{R} \cap \mathcal{C} \cap \mathcal{A} \cap \mathcal{H}^c \\ 0, & \text{otherwise} \end{cases}$$

$$\mathbf{Q}_2(i, j) = \begin{cases} -(1+\epsilon)\lambda c_{\mathcal{A}^c}, & (i, j) \in \mathcal{R} \cap \mathcal{C}^c \cap \mathcal{A}^c \cap \mathcal{H}^c \\ \frac{1-p_{ij}}{p_{ij}}(1+\epsilon)\lambda c_{\mathcal{A}^c}, & (i, j) \in \mathcal{R} \cap \mathcal{C}^c \cap \mathcal{A} \cap \mathcal{H}^c \\ -(1+\epsilon)c_{\mathcal{C}}, & (i, j) \in \mathcal{R} \cap \mathcal{C} \cap \mathcal{A}^c \cap \mathcal{H}^c \\ \frac{1-\tau_1}{\tau_1}(1+\epsilon)c_{\mathcal{C}}, & (i, j) \in \mathcal{R} \cap \mathcal{C} \cap \mathcal{A} \cap \mathcal{H}^c \\ 0, & \text{otherwise} \end{cases}$$

$$\mathbf{Q}_3(i, j) = \begin{cases} (1+\epsilon)\lambda c_{\mathcal{A}}, & (i, j) \in \mathcal{R}^c \cap \mathcal{C}^c \cap \mathcal{A} \cap \mathcal{H}^c \\ -\frac{q_{ij}}{1-q_{ij}}(1+\epsilon)\lambda c_{\mathcal{A}}, & (i, j) \in \mathcal{R}^c \cap \mathcal{C}^c \cap \mathcal{A}^c \cap \mathcal{H}^c \\ (1+\epsilon)c_{\mathcal{C}}, & (i, j) \in \mathcal{R}^c \cap \mathcal{C} \cap \mathcal{A} \cap \mathcal{H}^c \\ -\frac{1-\tau_2}{\tau_2}(1+\epsilon)c_{\mathcal{C}}, & (i, j) \in \mathcal{R}^c \cap \mathcal{C} \cap \mathcal{A}^c \cap \mathcal{H}^c \\ 0, & \text{otherwise} \end{cases}$$

The only difference is that we remove  $\mathbf{Q}_4$  since there are no outliers. Similar to Lemma A-5 and Lemma A-6, from the matrix Bernstein inequality, the followings hold with probability at least  $1 - n^{-10}$ :

$$\|\mathbf{Q}_1\| \leq c \left[ \frac{\log n}{pK^*} + \sqrt{\frac{2n(1-\tau)}{K^{*2}} + \frac{\max_i\{K_i - s_i\}}{pK^{*2}}} \cdot \sqrt{\log n} \right]$$

$$\|\mathbf{Q}_2\| \leq c \left[ \max\left\{\frac{2\lambda c_{\mathcal{A}^c}}{p}, 2c_{\mathcal{C}}\right\} \log n + \sqrt{8nc_{\mathcal{C}}^2(1-\tau) + \max_i\{K_i - s_i\} \frac{4\lambda^2 c_{\mathcal{A}^c}^2(1-t)}{p}} \cdot \sqrt{\log n} \right]$$

$$\|\mathbf{Q}_3\| \leq c \left[ \max\left\{\frac{2\lambda c_{\mathcal{A}}}{1-q}, 2c_{\mathcal{C}}\right\} \log n + \sqrt{8nc_{\mathcal{C}}^2(1-\tau) + \max_i\left\{\sum_{j \neq i} (K_j - s_j)\right\} \frac{4\lambda^2 c_{\mathcal{A}}^2 t}{1-q}} \cdot \sqrt{\log n} \right],$$

and

$$|(\mathbf{U}\mathbf{U}^\top \mathbf{Q}_1)_{ij}| \leq c \left( \frac{\sqrt{(2s(1-\tau)/K^{*2} + \max_i\{K_i - s_i\}/(pK^{*2})) \log n}}{K^*} + \frac{\log n}{pK^{*2}} \right)$$

$$|(\mathbf{U}\mathbf{U}^\top \mathbf{Q}_2)_{ij}| \leq c \left( \frac{\sqrt{(8sc_{\mathcal{C}}^2(1-\tau) + 4\max_i\{K_i - s_i\}\lambda^2 c_{\mathcal{A}^c}^2(1-t)/p) \log n}}{K^*} + \max\left\{\frac{2\lambda c_{\mathcal{A}^c}}{p}, 2c_{\mathcal{C}}\right\} \cdot \frac{\log n}{K^*} \right)$$

$$|(\mathbf{U}\mathbf{U}^\top \mathbf{Q}_3)_{ij}| \leq c \left( \frac{\sqrt{(8sc_{\mathcal{C}}^2(1-\tau) + 4\max_i\{\sum_{j \neq i} (K_j - s_j)\}\lambda^2 c_{\mathcal{A}}^2 t/(1-q)) \log n}}{K^*} + \max\left\{\frac{2\lambda c_{\mathcal{A}}}{1-q}, 2c_{\mathcal{C}}\right\} \cdot \frac{\log n}{K^*} \right).$$

Since  $\max_i\{K_i - s_i\} \leq \max_i\{\sum_{j \neq i} (K_j - s_j)\}$ , the terms  $\max_i\{K_i - s_i\}$  in these inequalities can be replaced by  $\max_i\{\sum_{j \neq i} (K_j - s_j)\}$ . Then one can prove the desired result easily by following the same calculation in Section 2.1.

### 3. Proof of Theorem 2

Recall that the graph has  $n$  nodes,  $r$  clusters and  $n - \sum_{i=1}^r K_i$  outliers.  $K$  is the minimum cluster size, i.e.,  $K = \min_i K_i$ . For clarity, the constants may vary from line to line.

**Step 1.** The  $n$  nodes are uniformly randomly separated into  $m$  groups which form  $m$  small graphs  $\{g_1, \dots, g_m\}$ . For each  $i \in [n]$  and  $j \in [m]$ , node  $i$  is assigned to graph  $g_j$  with probability  $\frac{1}{m}$ . For  $g \in \{g_1, \dots, g_m\}$ , let  $K_i^g$  be the number of the nodes in the  $i$ th cluster that are assigned to graph  $g$  and let  $n^g$  be the number of nodes in  $g$ . Clearly,  $K_i^g$  and  $n^g$  are two random variables whose expected values are  $\mathbb{E}[K_i^g] = \frac{K_i}{m}$  and  $\mathbb{E}[n^g] = \frac{n}{m}$ , respectively. From the Hoeffding's inequality,

$$\mathbb{P}[|K_i^g - \mathbb{E}[K_i^g]| \geq t] \leq 2 \exp\left(-\frac{2t^2}{K_i}\right).$$

For constant  $\rho < 1$ , let  $t = \frac{1-\rho}{2(1+\rho)m} K_i$ , then we have

$$\mathbb{P}\left[\left|K_i^g - \frac{K_i}{m}\right| \geq \frac{1-\rho}{2(1+\rho)m} K_i\right] \leq 2 \exp\left(-\frac{(1-\rho)^2 K_i}{2(1+\rho)^2 m^2}\right) \leq 2 \exp\left(-\frac{(1-\rho)^2 K}{2(1+\rho)^2 m^2}\right).$$

In other words,  $\frac{1+3\rho}{2(1+\rho)m} K_i \leq K_i^g \leq \frac{3+\rho}{2(1+\rho)m} K_i$  holds with probability at least  $1 - 2 \exp\left(-\frac{(1-\rho)^2 K}{2(1+\rho)^2 m^2}\right)$ . Similarly,  $\frac{1+3\rho}{2(1+\rho)m} n \leq n^g \leq \frac{3+\rho}{2(1+\rho)m} n$  holds with probability at least  $1 - 2 \exp\left(-\frac{(1-\rho)^2 n}{2(1+\rho)^2 m^2}\right)$ . By the union bound, we have

$$\frac{1+3\rho}{2(1+\rho)m} K_i \leq K_i^g \leq \frac{3+\rho}{2(1+\rho)m} K_i \text{ for } i \in [r], g \in \{g_1, \dots, g_m\} \text{ and } \frac{1+3\rho}{2(1+\rho)m} n \leq n^g \leq \frac{3+\rho}{2(1+\rho)m} n \quad (\text{A-1})$$

hold with probability at least  $1 - 2(mr + 1) \exp\left(-\frac{(1-\rho)^2 K}{2(1+\rho)^2 m^2}\right)$ . Since  $m \leq \frac{1-\rho}{4(1+\rho)} \sqrt{\frac{K}{\log n}}$  and  $mr + 1 \leq \frac{mn}{K} + 1 \leq n$ , (A-1) holds with probability at least  $1 - n^{-6}$ .

**Step 2.** After all the subgraphs are generated, we perform algorithm  $\mathfrak{A}$  on each subgraph  $g \in \{g_1, \dots, g_m\}$ . Let  $\mathcal{S}_g$  be the set of the recovered clusters in  $g$ . Since  $\mathfrak{A}$  is  $\lambda$ -workable and  $\frac{1+3\rho}{2(1+\rho)m} K_i \leq K_i^g \leq \frac{3+\rho}{2(1+\rho)m} K_i$  for  $i \in [r]$  holds with high probability, we know that when  $(p, q)$  is in  $\mathfrak{C}(n/m, K_1/m, \dots, K_r/m, \lambda, \mathcal{I})$ ,  $\mathcal{S}_g$  satisfies that 1) for each  $i \in \mathcal{I}$ , there exists  $\mathcal{C}_i \in \mathcal{S}_g$  such that  $\mathcal{C}_i$  a subset of the  $i$ th cluster and  $|\mathcal{C}_i| \geq \lambda_i K_i^g \geq \frac{1+3\rho}{2(1+\rho)m} \lambda_i K_i$ , and 2) for each cluster  $\mathcal{C} \in \mathcal{S}_g \setminus \bigcup_{i \in \mathcal{I}} \mathcal{C}_i$ , we have  $|\mathcal{C}| < \min_{i \in \mathcal{I}} \rho \lambda_i K_i^g \leq \frac{3\rho+\rho^2}{2(1+\rho)m} \min_{i \in \mathcal{I}} \lambda_i K_i$ , with probability at least  $1 - n^{-2}$ . By the union bound, with probability at least  $1 - n^{-1}$ , all of  $\mathcal{S}_{g_1}, \dots, \mathcal{S}_{g_m}$  satisfy these two properties.

In the ‘‘breaking up small clusters’’ step, note that threshold  $T$  satisfies  $\frac{T}{\min_{i \in \mathcal{I}} \lambda_i K_i} \in \left(\frac{3\rho+\rho^2}{2(1+\rho)m}, \frac{1+3\rho}{2(1+\rho)m}\right)$ . For each  $\mathcal{S}_g \in \{\mathcal{S}_{g_1}, \dots, \mathcal{S}_{g_m}\}$ , after breaking up the clusters in  $\mathcal{S}_g$  whose size is less than  $T$ ,  $\mathcal{S}_g$  becomes

$$\mathcal{S}_g^0 = \bigcup_{i \in \mathcal{I}} \mathcal{C}_i \cup \left\{ \{u\} : \forall u \in \mathcal{C}, \forall \mathcal{C} \in \mathcal{S}_g \setminus \bigcup_{i \in \mathcal{I}} \mathcal{C}_i \right\}.$$

Then for each  $\mathcal{C}_i \in \mathcal{S}_g^0$ ,  $\mathcal{C}_i$  is uniformly randomly divided into  $l$  clusters, namely,  $\{\mathcal{C}_i^1, \dots, \mathcal{C}_i^l\}$ . Since w.h.p

$$|\mathcal{C}_i| \geq \frac{1+3\rho}{2(1+\rho)m} \min_{j \in \mathcal{I}} \lambda_j K_j, \quad \forall i \in \mathcal{I},$$

by the Hoeffding's inequality and the union bound, one can easily verify that for all  $\mathcal{S}_g^0 \in \{\mathcal{S}_{g_1}^0, \dots, \mathcal{S}_{g_m}^0\}$  and  $\mathcal{C}_i \in \mathcal{S}_g^0$ ,

the following inequality holds with probability at least  $1 - n^{-6}$  when  $l \leq \frac{1}{4} \sqrt{\frac{(1+3\rho) \min_{i \in \mathcal{I}} \lambda_i K_i}{2(1+\rho)m \log n}}$  or  $l = 1$ :

$$|\mathcal{C}_i^k| \geq \frac{1+3\rho}{4(1+\rho)ml} \min_{j \in \mathcal{I}} \lambda_j K_j, \quad \forall i \in \mathcal{I}, k \in [l].$$

Therefore, after the ‘‘breaking up small clusters’’ step,  $\mathcal{S}_g$  becomes

$$\mathcal{S}_g^1 = \bigcup_{i \in \mathcal{I}} \bigcup_{k \in [l]} \mathcal{C}_i^k \cup (\mathcal{S}_g^0 \setminus \bigcup_{i \in \mathcal{I}} \mathcal{C}_i).$$

For simplicity, we use  $\mathcal{S}_g$  instead of  $\mathcal{S}_g^1$  in the following parts.

**Step 3.** We now analyze the properties of the fused graph. We view each cluster  $\mathcal{U}_i$  in  $\bigcup_{i=1}^m \mathcal{S}_{g_i}$  as a super node  $V_i$ . If  $|\mathcal{U}_i| > 1$ ,  $V_i$  is added into the ‘‘high confidence node’’ set  $\mathcal{H}$ , which means  $V_i$  is a high confidence node in the fused graph. Otherwise,  $V_i$  is an ordinary node. For two nodes  $V_i$  and  $V_j$ , we say ‘‘ $V_i$  and  $V_j$  are in the same cluster’’ if the nodes in  $\mathcal{U}_i$  and  $\mathcal{U}_j$  belong to the same cluster. From the construction of the edge between  $V_i$  and  $V_j$ , we know that when  $V_i$  and  $V_j$  are both ordinary nodes,  $E_{ij} = 1$  with probability at least  $p$  if  $V_i$  and  $V_j$  are in the same cluster or  $E_{ij} = 1$  with probability at most  $q$  otherwise. If one of  $V_i$  and  $V_j$  is a high confidence node, we compute

$$\hat{E}(V_i, V_j) := \frac{\sum_{u \in \mathcal{U}_i} \sum_{v \in \mathcal{U}_j} A_{uv}}{\sum_{u \in \mathcal{U}_i} \sum_{v \in \mathcal{U}_j} 1}.$$

We let  $X \triangleq \hat{E}(V_i, V_j)$  and  $Z \triangleq \sum_{u \in \mathcal{U}_i} \sum_{v \in \mathcal{U}_j} 1$ . Clearly,  $V_i$  and  $V_j$  being in the same cluster means that  $\mathbb{E}[A_{uv}] \geq p$  for any  $u \in \mathcal{U}_i$  and  $v \in \mathcal{U}_j$ , which implies that  $\mathbb{E}[X] \geq p$ . From the Hoeffding’s inequality, we have

$$\mathbb{P}[|X - \mathbb{E}[X]| \geq \theta] \leq 2 \exp(-2Z\theta^2) \leq 2 \exp\left(-\frac{1+3\rho}{2(1+\rho)ml} \min_{i \in \mathcal{I}} \lambda_i K_i \theta^2\right).$$

Thus,  $X \geq p - \theta$  holds with probability at least  $1 - 2 \exp\left(-\frac{1+3\rho}{2(1+\rho)ml} \min_{i \in \mathcal{I}} \lambda_i K_i \theta^2\right)$ . Similarly,  $V_i$  and  $V_j$  being in different clusters means  $\mathbb{E}[A_{uv}] \leq q$  for any  $u \in \mathcal{U}_i$  and  $v \in \mathcal{U}_j$ , which implies that  $\mathbb{E}[X] \leq q$ . From the Hoeffding’s inequality, we have  $X \leq q + \theta$  holds with probability at least  $1 - 2 \exp\left(-\frac{1+3\rho}{2(1+\rho)ml} \min_{i \in \mathcal{I}} \lambda_i K_i \theta^2\right)$ .

In Algorithm 2, we set  $E_{ij} = 1$  if  $X \geq t$  or  $E_{ij} = 0$  otherwise. Hence from the analysis above, we know that  $E_{ij} = 1$  with probability at least  $1 - 2 \exp\left(-\frac{1+3\rho}{2(1+\rho)ml} \min_{i \in \mathcal{I}} \lambda_i K_i (p-t)^2\right)$  if  $V_i$  and  $V_j$  are in the same cluster, while  $E_{ij} = 1$  with probability at most  $2 \exp\left(-\frac{1+3\rho}{2(1+\rho)ml} \min_{i \in \mathcal{I}} \lambda_i K_i (t-q)^2\right)$  if  $V_i$  and  $V_j$  are in different clusters. Recall that  $t \in (\frac{1}{4}p + \frac{3}{4}q, \frac{3}{4}p + \frac{1}{4}q)$ . Since  $p - q \geq c_2 \sqrt{\frac{(1+\rho)ml \log \frac{n}{K}}{(1+3\rho) \min_{i \in \mathcal{I}} \lambda_i K_i}}$ , we have

$$\tau \triangleq 1 - 2 \exp\left(-\frac{1+3\rho}{32(1+\rho)ml} \min_{i \in \mathcal{I}} \lambda_i K_i (p-q)^2\right) \geq 1 - c_\tau \frac{K}{n},$$

where  $c_\tau$  and  $c_2$  are universal constants. Then we have

- $E_{ij} = 1$  with probability at least  $p$  if  $V_i$  and  $V_j$  are ordinary and in the same cluster;
- $E_{ij} = 1$  with probability at most  $q$  if  $V_i$  and  $V_j$  are ordinary and in different clusters;
- $E_{ij} = 1$  with probability at least  $\tau$  if  $V_i$  or  $V_j$  is high confident and they are in the same cluster;
- $E_{ij} = 1$  with probability at most  $1 - \tau$  if  $V_i$  or  $V_j$  is high confident and they are in different clusters;

**Step 4.** We perform the graph clustering algorithm (1) on the fused graph  $\mathcal{G} = (\mathcal{V}, \mathcal{E})$ . From the analysis above, we know that the number of the high confidence nodes in  $\mathcal{G}$  is at least  $ml|\mathcal{I}|$ , the size of the smallest cluster in  $\mathcal{G}$  that contains no

ordinary nodes is at least  $ml$ , the total number of the ordinary nodes in  $\mathcal{G}$  is at most  $n - \sum_{i \in \mathcal{I}} \lambda_i K_i$ , and the total number of the nodes is at least  $mr$ . Let  $\mathcal{J}$  be the set  $\{i \in \mathcal{I} : \lambda_i \neq 1\}$ , then the size of the smallest cluster that contains at least one ordinary node is at least  $S(m, l) = \min\{\min_{i \in \mathcal{J}} \{ml + (1 - \lambda_i)K_i\}, \min_{i \in \mathcal{I}^c} K_i\}$ . From Theorem 1, if  $ml \geq c_3 \log n$  and

$$\frac{p - q}{\sqrt{p(1 - q)}} \geq c_1 \max \left\{ \frac{\sqrt{(n - \sum_{i \in \mathcal{I}} \lambda_i K_i) \log n}}{S(m, l)}, \sqrt{\frac{\log n}{S(m, l)}} \right\},$$

then the clusters in graph  $\mathcal{G}$  can be correctly recovered with probability at least  $1 - (mr)^{-10}$ .

Overall, if  $c_3 \log n \leq m \leq \frac{1 - \rho}{4(1 + \rho)} \sqrt{\frac{K}{\log n}}$  and

$$p - q \geq \max \left\{ c_1 \sqrt{p(1 - q)} \max \left\{ \frac{\sqrt{(n - \sum_{i \in \mathcal{I}} \lambda_i K_i) \log n}}{S(m, l)}, \sqrt{\frac{\log n}{S(m, l)}} \right\}, c_2 \sqrt{\frac{(1 + \rho)ml \log \frac{n}{K}}{(1 + 3\rho) \min_{i \in \mathcal{I}} \lambda_i K_i}} \right\}$$

hold, Algorithm 1 outputs the true clusters w.h.p. By minimizing the right hand side over  $l$ , we obtain this theorem.

#### 4. Proof of Theorem 3

We use the same notation as that in the proof of Theorem 2.

**Step 1.** This step is similar to Step 1 in the proof of Theorem 2. The  $n$  nodes are uniformly randomly separated into  $m$  groups which form  $m$  subgraphs  $\{g_1, \dots, g_m\}$ . As shown above, we can prove that

$$\frac{1 + 3\rho}{2(1 + \rho)m} K_i \leq K_i^g \leq \frac{3 + \rho}{2(1 + \rho)m} K_i \text{ for } i \in [r], g \in \{g_1, \dots, g_m\} \text{ and } \frac{1 + 3\rho}{2(1 + \rho)m} n \leq n^g \leq \frac{3 + \rho}{2(1 + \rho)m} n \quad (\text{A-2})$$

hold with probability at least  $1 - n^{-6}$  since  $m \leq \frac{1 - \rho}{4(1 + \rho)} \sqrt{\frac{K}{\log n}}$ .

**Step 2.** After the subgraphs are obtained, we perform algorithm  $\mathfrak{A}$  on each subgraph  $g \in \{g_1, \dots, g_m\}$ . Let  $\mathcal{S}_g$  be the set of the recovered clusters in  $g$ . Since algorithm  $\mathfrak{A}$  is  $(\lambda, \mathcal{I}, \epsilon)$ -pseudo-workable and  $\frac{1 + 3\rho}{2(1 + \rho)m} K_i \leq K_i^g \leq \frac{3 + \rho}{2(1 + \rho)m} K_i$  for  $i \in [r]$  holds with high probability, when  $(p, q)$  is in  $\mathcal{C}(n/m, K_1/m, \dots, K_r/m, \lambda, \mathcal{I}, \epsilon)$ , we know that with probability at least  $1 - n^{-2}$ ,  $\mathcal{S}_g$  satisfies that 1) for each  $i \in \mathcal{I}$ , there exists  $\mathcal{C}_i \in \mathcal{S}_g$  so that  $\mathcal{C}_i$  contains at least  $\lambda_i K_i^g$  nodes in the  $i$ th cluster and at most  $\epsilon_i K_i^g$  nodes not in the  $i$ th cluster, which implies that  $|\mathcal{C}_i| \geq \lambda_i K_i^g \geq \frac{1 + 3\rho}{2(1 + \rho)m} \lambda_i K_i$ , 2) for each cluster  $\mathcal{C} \in \mathcal{S}_g \setminus \bigcup_{i \in \mathcal{I}} \mathcal{C}_i$ , we have  $|\mathcal{C}| < \min_{i \in \mathcal{I}} \rho \lambda_i K_i^g \leq \frac{3\rho + \rho^2}{2(1 + \rho)m} \min_{i \in \mathcal{I}} \lambda_i K_i$ . By the union bound, with probability at least  $1 - n^{-1}$ , all of  $\mathcal{S}_{g_1}, \dots, \mathcal{S}_{g_m}$  satisfy these two properties.

In the ‘‘breaking up small clusters’’ step, note that  $\frac{T}{\min_{i \in \mathcal{I}} \lambda_i K_i} \in (\frac{3\rho + \rho^2}{2(1 + \rho)m}, \frac{1 + 3\rho}{2(1 + \rho)m})$ , and each  $\mathcal{C}_i \in \mathcal{S}_g$  is divided into  $l$  clusters  $\{\mathcal{C}_i^1, \dots, \mathcal{C}_i^l\}$  while the clusters in  $\mathcal{S}_g \setminus \bigcup_{i \in \mathcal{I}} \mathcal{C}_i$  are broken up to single nodes. By the Hoeffding’s inequality and the union bound, we have for all  $\mathcal{S}_g \in \{\mathcal{S}_{g_1}, \dots, \mathcal{S}_{g_m}\}$  and  $\mathcal{C}_i \in \mathcal{S}_g$

$$|\mathcal{C}_i^k| \geq \frac{1 + 3\rho}{4(1 + \rho)ml} \lambda_i K_i, \forall i \in \mathcal{I}, k \in [l] \quad (\text{A-3})$$

holds with probability at least  $1 - n^{-6}$  when  $l \leq \frac{1}{4} \sqrt{\frac{(1 + 3\rho) \min_{i \in \mathcal{I}} \lambda_i K_i}{2(1 + \rho)m \log n}}$  or  $l = 1$ . Then after this step,  $\mathcal{S}_g$  becomes

$$\mathcal{S}_g = \bigcup_{i \in \mathcal{I}} \bigcup_{k \in [l]} \mathcal{C}_i^k \cup \left\{ \{u\} : \forall u \in \mathcal{C}, \forall \mathcal{C} \in \mathcal{S}_g \setminus \bigcup_{i \in \mathcal{I}} \mathcal{C}_i \right\}.$$

**Step 3.** In the ‘‘building the fused graph’’ step, we view each cluster  $\mathcal{U}_i$  in  $\bigcup_{i=1}^m \mathcal{S}_{g_i}$  as a super node  $V_i$ . If  $|\mathcal{U}_i| > 1$ ,  $V_i$

is added into the “high confidence node” set  $\mathcal{H}$ , which means  $V_i$  is a high confidence node. Otherwise,  $V_i$  is an ordinary node. For two nodes  $V_i$  and  $V_j$ , from the construction of the edge between  $V_i$  and  $V_j$ , we know that if  $V_i$  and  $V_j$  are both ordinary nodes, then  $E_{ij} = 1$  with probability at least  $p$  if  $V_i$  and  $V_j$  are in the same cluster while  $E_{ij} = 1$  with probability at most  $q$  if  $V_i$  and  $V_j$  are in different clusters. If one of  $V_i$  and  $V_j$  is high confident, we compute

$$\hat{E}(V_i, V_j) = \frac{\sum_{u \in \mathcal{U}_i} \sum_{v \in \mathcal{U}_j} A_{uv}}{\sum_{u \in \mathcal{U}_i} \sum_{v \in \mathcal{U}_j} 1}.$$

Note that because  $\mathfrak{A}$  is  $(\lambda, \mathcal{I}, \epsilon)$ -pseudo-workable,  $\mathcal{U}_i$  may contain some outliers when  $|\mathcal{U}_i| > 1$ . We denote the inlier and outlier nodes in  $\mathcal{U}_i$  by  $\bar{\mathcal{U}}_i$  and  $\hat{\mathcal{U}}_i$ , respectively. Suppose that the inlier nodes belong to the  $k$ th cluster, then from Inequality (A-2) and (A-3), we know that  $|\bar{\mathcal{U}}_i| \geq \frac{1+3\rho}{4(1+\rho)ml} \lambda_k K_k$  and  $|\hat{\mathcal{U}}_i| \leq \frac{3+\rho}{2(1+\rho)m} \epsilon_k K_k$  hold with high probability.

We first consider the case that  $V_i$  and  $V_j$  are in the same cluster, e.g.,  $V_i, V_j$  belong to the  $k$ th cluster. Then

$$\hat{E}(V_i, V_j) \geq \frac{\sum_{u \in \bar{\mathcal{U}}_i} \sum_{v \in \bar{\mathcal{U}}_j} A_{uv}}{(|\bar{\mathcal{U}}_i| + |\hat{\mathcal{U}}_i|)(|\bar{\mathcal{U}}_j| + |\hat{\mathcal{U}}_j|)} \geq \frac{\sum_{u \in \bar{\mathcal{U}}_i} \sum_{v \in \bar{\mathcal{U}}_j} A_{uv}}{|\bar{\mathcal{U}}_i| |\bar{\mathcal{U}}_j|} \left( 1 - \frac{|\hat{\mathcal{U}}_i|}{|\bar{\mathcal{U}}_i|} - \frac{|\hat{\mathcal{U}}_j|}{|\bar{\mathcal{U}}_j|} - \frac{|\hat{\mathcal{U}}_i| |\hat{\mathcal{U}}_j|}{|\bar{\mathcal{U}}_i| |\bar{\mathcal{U}}_j|} \right).$$

Since  $l \leq \frac{p-q}{72} \min_{k \in \mathcal{I}} \frac{\lambda_k}{\epsilon_k}$ , we have  $\frac{|\hat{\mathcal{U}}_i|}{|\bar{\mathcal{U}}_i|}, \frac{|\hat{\mathcal{U}}_j|}{|\bar{\mathcal{U}}_j|} \leq \frac{2(3+\rho)}{1+3\rho} \cdot \frac{\epsilon_k l}{\lambda_k} \leq \frac{6\epsilon_k l}{\lambda_k} \leq 1$ , which implies that

$$\hat{E}(V_i, V_j) \geq \frac{\sum_{u \in \bar{\mathcal{U}}_i} \sum_{v \in \bar{\mathcal{U}}_j} A_{uv}}{|\bar{\mathcal{U}}_i| |\bar{\mathcal{U}}_j|} \left( 1 - \max_{k \in \mathcal{I}} \frac{18\epsilon_k l}{\lambda_k} \right).$$

From the Hoeffding’s inequality, one can easily verify that  $\hat{E}(V_i, V_j) \geq (p-\theta) \left( 1 - \max_{k \in \mathcal{I}} \frac{18\epsilon_k l}{\lambda_k} \right)$  holds with probability at least  $1 - 2 \exp \left( -\frac{1+3\rho}{2(1+\rho)ml} \min_{i \in \mathcal{I}} \lambda_i K_i \theta^2 \right)$ .

Similarly, when  $V_i$  and  $V_j$  are in different clusters, we have

$$\hat{E}(V_i, V_j) \leq \frac{\sum_{u \in \bar{\mathcal{U}}_i} \sum_{v \in \bar{\mathcal{U}}_j} A_{uv} + |\bar{\mathcal{U}}_i| |\hat{\mathcal{U}}_j| + |\hat{\mathcal{U}}_i| |\bar{\mathcal{U}}_j| + |\hat{\mathcal{U}}_i| |\hat{\mathcal{U}}_j|}{|\bar{\mathcal{U}}_i| |\bar{\mathcal{U}}_j|} \leq \frac{\sum_{u \in \bar{\mathcal{U}}_i} \sum_{v \in \bar{\mathcal{U}}_j} A_{uv}}{|\bar{\mathcal{U}}_i| |\bar{\mathcal{U}}_j|} + \max_{k \in \mathcal{I}} \frac{18\epsilon_k l}{\lambda_k}.$$

From the Hoeffding’s inequality, we know that  $\hat{E}(V_i, V_j) \leq q + \theta + \max_{k \in \mathcal{I}} \frac{18\epsilon_k l}{\lambda_k}$  holds with probability at least  $1 - 2 \exp \left( -\frac{1+3\rho}{2(1+\rho)ml} \min_{i \in \mathcal{I}} \lambda_i K_i \theta^2 \right)$ .

Let  $\varphi \triangleq \max_{k \in \mathcal{I}} \frac{18\epsilon_k l}{\lambda_k}$ . Since  $l \leq \frac{p-q}{72} \min_{k \in \mathcal{I}} \frac{\lambda_k}{\epsilon_k}$ ,  $\varphi \leq \frac{1}{4}(p-q)$ , which implies that the inequality  $\frac{1}{4}p + \frac{3}{4}q + \varphi \leq (\frac{3}{4}p + \frac{1}{4}q)(1-\varphi)$  hold. Therefore, there exists  $t$  such that  $\frac{1}{4}p + \frac{3}{4}q + \varphi \leq t \leq (\frac{3}{4}p + \frac{1}{4}q)(1-\varphi)$ . In Algorithm 2, we set  $E_{ij} = 1$  if  $X \geq t$  or  $E_{ij} = 0$  otherwise. Hence  $E_{ij} = 1$  with probability at least  $1 - 2 \exp \left( -\frac{1+3\rho}{2(1+\rho)ml} \min_{i \in \mathcal{I}} \lambda_i K_i (p - \frac{t}{1-\varphi})^2 \right)$  if  $V_i$  and  $V_j$  are in the same cluster, while  $E_{ij} = 1$  with probability at most  $2 \exp \left( -\frac{1+3\rho}{2(1+\rho)ml} \min_{i \in \mathcal{I}} \lambda_i K_i (t - q - \varphi)^2 \right)$  if  $V_i$  and  $V_j$  are in different clusters. Since  $\frac{1}{4}p + \frac{3}{4}q + \varphi \leq t \leq (\frac{3}{4}p + \frac{1}{4}q)(1-\varphi)$ , we have

$$\frac{1}{4}p + \frac{3}{4}q \leq \frac{t}{1-\varphi} \leq \frac{3}{4}p + \frac{1}{4}q, \text{ and } \frac{1}{4}p + \frac{3}{4}q \leq t - c \leq \frac{3}{4}p + \frac{1}{4}q.$$

When  $p - q \geq c_2 \sqrt{\frac{(1+\rho)ml \log \frac{n}{K}}{(1+3\rho) \min_{i \in \mathcal{I}} \lambda_i K_i}}$ , we have

$$\tau \triangleq 1 - 2 \exp \left( -\frac{1+3\rho}{32(1+\rho)ml} \min_{i \in \mathcal{I}} \lambda_i K_i (p - q)^2 \right) \geq 1 - c_\tau \frac{K}{n},$$

where  $c_\tau$  and  $c_2$  are universal constants. Hence we have

- $E_{ij} = 1$  with probability at least  $p$  if  $V_i$  and  $V_j$  are ordinary and in the same cluster;
- $E_{ij} = 1$  with probability at most  $q$  if  $V_i$  and  $V_j$  are ordinary and in different clusters;
- $E_{ij} = 1$  with probability at least  $\tau$  if  $V_i$  or  $V_j$  is high confident and the inlier nodes of  $\mathcal{U}_i$  and  $\mathcal{U}_j$  are in the same cluster;
- $E_{ij} = 1$  with probability at most  $1 - \tau$  if  $V_i$  or  $V_j$  is high confident and the inlier nodes of  $\mathcal{U}_i$  and  $\mathcal{U}_j$  are in different clusters;

**Step 4.** We run the graph clustering algorithm (1) on the fused graph  $\mathcal{G} = (\mathcal{V}, \mathcal{E})$ . From the analysis above, we know that the number of the high confidence nodes in  $\mathcal{G}$  is at least  $ml|\mathcal{I}|$ , the size of the smallest cluster in  $\mathcal{G}$  that contains no ordinary nodes is at least  $ml$ , the total number of the ordinary nodes in  $\mathcal{G}$  is at most  $n - \sum_{i \in \mathcal{I}} \lambda_i K_i$ , and the total number of the nodes is at least  $mr$ . Let  $\mathcal{J}$  be the set  $\{i \in \mathcal{I} : \lambda_i \neq 1\}$ , then the size of the smallest cluster that contains at least one ordinary node is at least  $S(m, l) = \min\{\min_{i \in \mathcal{J}} \{ml + [(1 - \lambda_i)K_i - \sum_{j \in \mathcal{I}, j \neq i} \epsilon_j K_j]_+\}, \max\{\min_{i \in \mathcal{I}^c} K_i - \sum_{j \in \mathcal{I}} \epsilon_j K_j, 1\}\}$ . From Theorem 1, if  $ml \geq c_3 \log n$  and

$$\frac{p - q}{\sqrt{p(1 - q)}} \geq c_1 \max \left\{ \frac{\sqrt{(n - \sum_{i=1}^r \lambda_i K_i) \log n}}{S(m, l)}, \sqrt{\frac{\log n}{S(m, l)}} \right\},$$

then the clusters in graph  $\mathcal{G}$  can be correctly recovered with probability at least  $1 - (mr)^{-10}$ .

Overall, if  $c_3 \log n \leq m \leq \frac{1 - \rho}{4(1 + \rho)} \sqrt{\frac{K}{\log n}}$  and

$$p - q \geq \max \left\{ c_1 \sqrt{p(1 - q)} \max \left\{ \frac{\sqrt{(n - \sum_{i=1}^r \lambda_i K_i) \log n}}{S(m, l)}, \sqrt{\frac{\log n}{S(m, l)}} \right\}, c_2 \sqrt{\frac{(1 + \rho)ml \log \frac{n}{K}}{(1 + 3\rho) \min_{i \in \mathcal{I}} \lambda_i K_i}}, 72 \max_{i \in \mathcal{I}} \frac{\epsilon_i}{\lambda_i} \right\}$$

hold, the output of Algorithm 1 contains at most  $\sum_{i=1}^r \epsilon_i K_i$  misclassified nodes.

## 5. Proof of Corollary 1

Since algorithm  $\mathfrak{A}$  recovers clusters by solving (1) with  $\mathcal{C} = \emptyset$ , we have that  $\mathfrak{A}$  is  $(\mathbf{1}, [r])$ -workable with  $\rho = 0$  and set  $\mathfrak{C}$  defined by

$$\mathfrak{C} = \left\{ (p, q) : \frac{p - q}{\sqrt{p(1 - q)}} \geq c_1 \frac{\sqrt{n \log n}}{K} \right\}$$

where  $K$  is the size of the smallest cluster in the graph and  $c_1$  is a universal constant.

Then from Theorem 2, we know that in order to recover the true clusters,  $(p, q)$  should satisfy

$$\frac{p - q}{\sqrt{p(1 - q)}} \geq c_1 \frac{\sqrt{mn \log n}}{K}.$$

and

$$\begin{aligned} p - q &\geq \min_{\bar{l} \geq l \geq 1} \max \left\{ c_1 \sqrt{p(1 - q)} \max \left\{ \frac{\sqrt{(n - \sum_{i \in \mathcal{I}} \lambda_i K_i) \log n}}{S(m, l)}, \sqrt{\frac{\log n}{S(m, l)}} \right\}, c_2 \sqrt{\frac{(1 + \rho)ml \log \frac{n}{K}}{(1 + 3\rho) \min_{i \in \mathcal{I}} \lambda_i K_i}} \right\} \\ &= \min_{\bar{l} \geq l \geq 1} c_2 \sqrt{\frac{(1 + \rho)ml \log \frac{n}{K}}{(1 + 3\rho) \min_{i \in \mathcal{I}} \lambda_i K_i}} = c_2 \sqrt{\frac{m \log \frac{n}{K}}{K}}. \end{aligned}$$

Hence we obtain Corollary 1.

## 6. Proof of Corollary 2

Recall that algorithm  $\mathfrak{A}$  recovers clusters by solving (1) with  $\mathcal{C} = \emptyset$ . For a graph containing  $n$  nodes and  $r$  clusters with size  $\{K_1, \dots, K_r\}$ , we define

$$u = c_3 \frac{\sqrt{p(1-q)n}}{p-q} \log^2 n, \text{ and } l = c_4 \frac{\sqrt{p(1-q)n}}{p-q}.$$

Let  $\mathcal{K}_u$  be the set of the clusters whose sizes are greater than or equal to  $u$  and  $\mathcal{K}_l$  be the set of the clusters whose sizes are less than or equal to  $l$ . Let  $\mathbf{Y}^*$  be the true adjacent matrix, then by Theorem 1 in (Ailon et al., 2013), if each cluster is included in either  $\mathcal{K}_u$  or  $\mathcal{K}_l$ , then  $(\hat{\mathbf{Y}}, \mathbf{A} - \hat{\mathbf{Y}})$  is an optimal solution of (1) with probability at least  $1 - n^{-3}$ , where  $\hat{\mathbf{Y}}$  is defined as

$$\hat{\mathbf{Y}}(i, j) = \begin{cases} \mathbf{Y}^*(i, j), & \text{node } i \text{ and } j \text{ belongs to the same cluster in } \mathcal{K}_u \\ 0, & \text{otherwise.} \end{cases}$$

Let  $\mathcal{I} = \{i : K_i \geq u\}$  and  $\boldsymbol{\lambda}$  be a vector whose entry  $\lambda_i = 1$  if  $i \in \mathcal{I}$  or 0 otherwise. The conditions above related to  $(p, q)$  is denoted by  $\mathfrak{C}(n, K_1, \dots, K_r, \boldsymbol{\lambda}, \mathcal{I})$ . Clearly,  $\mathfrak{A}$  is  $(\boldsymbol{\lambda}, \mathcal{I})$ -workable with  $\rho = 0$  and set  $\mathfrak{C}(n, K_1, \dots, K_r, \boldsymbol{\lambda}, \mathcal{I})$ .

From Theorem 2, in order to recover the true clusters,  $(p, q)$  should be in  $\mathfrak{C}(n, K_1/m, \dots, K_r/m, \boldsymbol{\lambda}, \mathcal{I})$ , which means that for all  $i \in [r]$ , either  $K_i \geq u$  or  $K_i \leq l$  where

$$u = c_3 \frac{\sqrt{p(1-q)mn}}{p-q} \log^2 n, \text{ and } l = c_4 \frac{\sqrt{p(1-q)mn}}{p-q}.$$

Besides,  $(p, q)$  should also satisfy

$$p - q \geq \min_{l \geq l \geq 1} \max \left\{ c_1 \sqrt{p(1-q)} \max \left\{ \frac{\sqrt{(n - \sum_{i \in \mathcal{I}} \lambda_i K_i) \log n}}{S(m, l)}, \sqrt{\frac{\log n}{S(m, l)}} \right\}, c_2 \sqrt{\frac{(1 + \rho)ml \log \frac{n}{K}}{(1 + 3\rho) \min_{i \in \mathcal{I}} \lambda_i K_i}} \right\}, \quad (\text{A-4})$$

where  $S(m, l) = \min\{\min_{i \in \mathcal{I}: \lambda_i \neq 1} \{ml + (1 - \lambda_i)K_i\}, \min_{i \in \mathcal{I}^c} K_i\}$ . Since  $\mathfrak{A}$  is  $(\boldsymbol{\lambda}, \mathcal{I})$ -workable, (A-4) becomes

$$\begin{aligned} p - q &\geq \max \left\{ c_1 \sqrt{p(1-q)} \max \left\{ \frac{\sqrt{\sum_{i \in \mathcal{I}^c} K_i \log n}}{\min_{i \in \mathcal{I}^c} K_i}, \sqrt{\frac{\log n}{\min_{i \in \mathcal{I}^c} K_i}} \right\}, c_2 \sqrt{\frac{m \log \frac{n}{K}}{\min_{i \in \mathcal{I}} K_i}} \right\} \\ &= \max \left\{ c_1 \sqrt{p(1-q)} \max \left\{ \frac{\sqrt{\sum_{i \in \mathcal{I}^c} K_i \log n}}{K}, \sqrt{\frac{\log n}{K}} \right\}, c_2 \sqrt{\frac{m \log \frac{n}{K}}{\min_{i \in \mathcal{I}} K_i}} \right\} \end{aligned}$$

which implies that

$$K \geq \max \left\{ c_1 \frac{\sqrt{p(1-q) \sum_{i \in \mathcal{I}^c} K_i \log n}}{p-q}, c_1^2 \frac{p(1-q) \log n}{(p-q)^2} \right\}, \text{ and } m \leq \frac{(p-q)^2 \min_{i \in \mathcal{I}} K_i}{c_2^2 \log \frac{n}{K}}.$$

Besides,  $m$  should also satisfy  $c_3 \log n \leq m \leq \frac{1}{4} \sqrt{\frac{K}{\log n}}$ . Hence, by combining these inequalities together, we obtain this corollary.

## 7. Proof of Theorem 4

It requires  $O(f(\frac{n}{m})m)$  computation and  $O(g(\frac{n}{m})m)$  memory for  $\mathfrak{A}$  recovering the clusters in the subgraphs. From the proof of Theorem 3, we know that the size of the fused graph is  $O(mrl + n - \sum_{i \in \mathcal{I}} \lambda_i K_i)$ . Thus, recovering clusters in the

fused graph by solving (1) needs  $O((mrl + n - \sum_{i \in \mathcal{I}} \lambda_i K_i)^3)$  computation and  $O((mrl + n - \sum_{i \in \mathcal{I}} \lambda_i K_i)^2)$  memory. Hence we obtain this theorem.

## 8. Useful Lemmas

The following two lemmas are derived from the matrix Bernstein inequality (Tropp, 2012).

**Theorem A-1.** (Matrix Bernstein, (Tropp, 2012)) Let  $\mathbf{X}_1, \dots, \mathbf{X}_n$  be independent random matrices with common dimension  $d_1 \times d_2$ . Assume that each matrix has bounded deviation from its mean:

$$\|\mathbf{X}_k - \mathbb{E}\mathbf{X}_k\| \leq R \text{ for each } k = 1, \dots, n.$$

Form the sum  $\mathbf{Z} = \sum_{k=1}^n \mathbf{X}_k$ , and introduce a variance parameter

$$\sigma^2 = \max\{\|\mathbb{E}[(\mathbf{Z} - \mathbb{E}\mathbf{Z})(\mathbf{Z} - \mathbb{E}\mathbf{Z})^\top]\|, \|\mathbb{E}[(\mathbf{Z} - \mathbb{E}\mathbf{Z})^\top(\mathbf{Z} - \mathbb{E}\mathbf{Z})]\|\},$$

then

$$\mathbb{P}\{\|\mathbf{Z} - \mathbb{E}\mathbf{Z}\| \geq t\} \leq (d_1 + d_2) \exp\left(\frac{-t^2/2}{\sigma^2 + Rt/3}\right).$$

**Lemma A-5.** Suppose  $\mathbf{W}$  is a  $n \times n$  random matrix whose entries are independent random variables satisfying that  $\mathbb{E}[\mathbf{W}] = 0$ ,  $\|\mathbf{W}\|_\infty \leq b$ ,  $\text{Var}[W_{ij}] \leq \sigma_0^2$  for  $(i, j) \in \mathcal{C}$  and  $\text{Var}[W_{ij}] \leq \sigma_1^2$  for  $(i, j) \in \mathcal{C}^c$ , then the following inequality holds with probability at least  $1 - n^{-10}$ :

$$\|\mathbf{W}\| \leq c \left( b \log n + \sqrt{(n\sigma_0^2 + (n-s)\sigma_1^2) \log n} \right)$$

where  $c$  is a universal constant.

*Proof.* Let  $\mathbf{e}_i$  be the  $i$ th standard basis vector, then

$$\mathbf{W} - \mathbb{E}\mathbf{W} = \sum_{i,j} W_{ij} \mathbf{e}_i \mathbf{e}_j^\top \triangleq \sum_{i,j} \mathbf{X}_{ij}.$$

Thus,  $\|\mathbf{X}_{ij}\| = |W_{ij}| \leq b$  for all  $(i, j)$ . Since the entries of  $\mathbf{W}$  are independent,

$$\begin{aligned} \|\mathbb{E}[(\mathbf{W} - \mathbb{E}\mathbf{W})(\mathbf{W} - \mathbb{E}\mathbf{W})^\top]\| &= \|\mathbb{E} \sum_{i,j} W_{ij}^2 \mathbf{e}_i \mathbf{e}_j^\top \mathbf{e}_j \mathbf{e}_i^\top\| \\ &\leq \|\mathbb{E} \sum_{(i,j) \in \mathcal{C}^c} W_{ij}^2 \mathbf{e}_i \mathbf{e}_j^\top \mathbf{e}_j \mathbf{e}_i^\top\| + \|\mathbb{E} \sum_{(i,j) \in \mathcal{C}} W_{ij}^2 \mathbf{e}_i \mathbf{e}_j^\top \mathbf{e}_j \mathbf{e}_i^\top\| \leq (n-s)\sigma_1^2 + n\sigma_0^2, \end{aligned}$$

where the last inequality follows from the definition of the high confidence nodes and the fact that the number of the high confidence nodes is  $s$ . Then from the matrix Bernstein inequality, there exists a universal constant  $c$  such that

$$\|\mathbf{W} - \mathbb{E}\mathbf{W}\| \leq c \left( b \log n + \sqrt{(n\sigma_0^2 + (n-s)\sigma_1^2) \log n} \right)$$

holds with probability at least  $1 - n^{-10}$ . □

**Lemma A-6.** Suppose  $\mathbf{W}$  is a  $n \times n$  random matrix whose entries are independent random variables satisfying that 1)  $\mathbb{E}[\mathbf{W}] = 0$ ; 2)  $\max_{i,j} |W_{ij}| \leq b_0$  and  $\text{Var}[W_{ij}] \leq \sigma_0^2$  for  $(i, j) \in \mathcal{C}$ ; 3)  $\max_{i,j} |W_{ij}| \leq b_1$  and  $\text{Var}[W_{ij}] \leq \sigma_1^2$  for

$(i, j) \in \mathcal{C}^c$ , then the following inequality holds with probability at least  $1 - n^{-10}$ :

$$|(\mathbf{U}\mathbf{U}^\top \mathbf{W})_{ij}| \leq \begin{cases} \frac{\sqrt{n\sigma_0^2 \log n}}{K} + \frac{b_0 \log n}{K}, & \text{all the nodes in } R(i) \text{ are high confident} \\ \frac{\sqrt{(s\sigma_0^2 + (n-s)\sigma_1^2) \log n}}{K^*} + \frac{\max\{b_0, b_1\} \log n}{K^*}, & \text{otherwise} \end{cases}$$

where  $c$  is a universal constant and  $R(i)$  is the cluster that node  $i$  belongs to.

*Proof.* Suppose cluster  $R(i)$  contains  $K(i)$  nodes, then

$$(\mathbf{U}\mathbf{U}^\top \mathbf{W})_{ij} = \frac{1}{K(i)} \sum_{j': (i, j') \in R(i)} \mathbf{W}_{ij'}.$$

If all the nodes in cluster  $R(i)$  are high confident, then

$$\sum_{j': (i, j') \in R(i)} \mathbb{E}[\mathbf{W}_{ij'}^2] = K(i)\sigma_0^2 \leq n\sigma_0^2.$$

Otherwise, suppose that cluster  $R(i)$  contains  $c(i)$  high confidence nodes, then

$$\sum_{j': (i, j') \in R(i)} \mathbb{E}[\mathbf{W}_{ij'}^2] = (K(i) - c(i))\sigma_1^2 + c(i)\sigma_0^2 \leq s\sigma_0^2 + (n - s)\sigma_1^2.$$

By the standard Bernstein inequality, we can obtain this theorem. □

## References

- Ailon, N., Chen, Y., and Xu, H. Breaking the small cluster barrier of graph clustering. In *International Conference on Machine Learning*, ICML '13, 2013.
- Tropp, J. A. User-friendly tail bounds for sums of random matrices. *Foundations of Computational Mathematics*, 12(4): 389–434, 2012.
